# Supplementary material for: Fine-Tuning EMS Treatments to Produce Large Sorghum Mutant Populations for FIND-IT
Source: Research Square preprint supplement (doi:10.21203/rs.3.rs-6499088/v1), 2025-05-29
Supplement: Supplementary file 1 [file 01edf240d75f5b6a84df535b.xlsx]

## Sheet: Figure1a_data_and_stats
EMS Treatment (%)	No. of Plants in 10m row	Date of Observation
0	115	2021-02-28
0.05	109	2021-02-28
0.15	99	2021-02-28
0.25	73	2021-02-28
0	137	2021-03-17
0	94	2021-03-17
0	117	2021-03-17
0.05	129	2021-03-17
0.05	91	2021-03-17
0.05	116	2021-03-17
0.15	157	2021-03-17
0.15	72	2021-03-17												Multiple Comparisons
0.15	121	2021-03-17												Dependent Variable:	No. of Plants in 10m row
0.25	95	2021-03-17												(I) EMS Treatment (%)			Mean Difference (I-J)	Std. Error	Sig.	95% Confidence Interval
0.25	95	2021-03-17																		Lower Bound	Upper Bound
0.25	97	2021-03-17												LSD	.00	.05	10.2857	13.2802	0.44619	-17.1233	37.6947
0	96	2021-04-14														.15	18.2857	13.2802	0.181248	-9.12329	45.6947
0	178	2021-04-14														.25	29.28571*	13.2802	0.0372645	1.87671	56.6947
0	101	2021-04-14													.05	.00	-10.2857	13.2802	0.44619	-37.6947	17.1233
0.05	112	2021-04-14														.15	8	13.2802	0.552557	-19.409	35.409
0.05	124	2021-04-14														.25	19	13.2802	0.165408	-8.409	46.409
0.05	85	2021-04-14													.15	.00	-18.2857	13.2802	0.181248	-45.6947	9.12329
0.15	73	2021-04-14														.05	-8	13.2802	0.552557	-35.409	19.409
0.15	116	2021-04-14														.25	11	13.2802	0.415662	-16.409	38.409
0.15	72	2021-04-14													.25	.00	-29.28571*	13.2802	0.0372645	-56.6947	-1.87671
0.25	64	2021-04-14														.05	-19	13.2802	0.165408	-46.409	8.409
0.25	115	2021-04-14														.15	-11	13.2802	0.415662	-38.409	16.409
0.25	94	2021-04-14												*. The mean difference is significant at the 0.05 level.
														No. of Plants in 10m row
														EMS Treatment (%)		N	Subset for alpha = 0.05
																	1
														Student-Newman-Keulsa	.25	7	90.4286
															.15	7	101.429
															.05	7	109.429
															.00	7	119.714
															Sig.		0.150481
														Means for groups in homogeneous subsets are displayed.
														a. Uses Harmonic Mean Sample Size = 7.000.

## Sheet: Figure1b_data_and_stats
EMS treatment	Head #	Bagging date	Aphids Rating (1 to 9)	Ergot Rating (1 to 9 )	Grubs Rating (1 to 9)	Mould Rating (1 to 9)
0	1	9/4	9	9	9	5
0	2	9/4	3	7	6	4
0	3	9/4	5	9	9	9
0	4	9/4	9	9	9	7
0	5	9/4	9	9	9	8
0	6	9/4	9	9	9	8
0	7	9/4	2	9	9	9
0	8	9/4	8	9	9	9
0	9	9/4	2	9	9	9
0	10	9/4	9	9	9	7
0	11	9/4	9	9	9	8
0	12	9/4	3	9	9	9
0	13	9/4	6	9	9	7
0	14	9/4	6	9	9	8
0	15	9/4	9	9	9	5												Aphids Rating (1 to 9)
0	16	9/4	4	9	9	7												EMS treatment		N	Subset for alpha = 0.05
0	17	9/4	9	9	9	7															1
0	18	9/4	3	9	9	7												Student-Newman-Keulsa	.00	100	5.72
0	19	9/4	7	9	9	6													.05	100	5.72
0	20	9/4	3	9	9	9													.25	100	5.9
0	21	9/4	9	9	9	5													.15	100	5.99
0	22	9/4	5	9	9	3													Sig.		0.884678
0	23	9/4	9	9	9	7												Means for groups in homogeneous subsets are displayed.
0	24	8/4	3	9	9	9												a. Uses Harmonic Mean Sample Size = 100.000.
0	25	8/4	6	9	9	5
0	26	8/4	4	9	9	4
0	27	8/4	5	9	9	7
0	28	10/4	9	9	9	8
0	29	8/4	4	9	9	4
0	30	8/4	2	9	9	8
0	31	8/4	2	9	9	8
0	32	8/4	5	9	9	7
0	33	8/4	6	9	9	3
0	34	8/4	4	7	9	4												Ergot Rating (1 to 9 )
0	35	8/4	9	9	9	6												EMS treatment		N	Subset for alpha = 0.05
0	36	8/4	4	9	9	5															1
0	37	8/4	3	9	9	5												Student-Newman-Keulsa	.25	100	8.82
0	38	8/4	5	9	9	6													.15	100	8.91
0	39	8/4	6	9	9	4													.00	100	8.94
0	40	8/4	2	9	9	4													.05	100	8.96
0	41	8/4	9	9	9	6													Sig.		0.164246
0	42	8/4	3	9	9	4												Means for groups in homogeneous subsets are displayed.
0	43	8/4	9	9	9	5												a. Uses Harmonic Mean Sample Size = 100.000.
0	44	8/4	5	9	9	5
0	45	8/4	7	9	9	4
0	46	10/4	8	9	9	6
0	47	8/4	6	9	9	4
0	48	8/4	6	9	8	4
0	49	8/4	5	9	9	3
0	50	8/4	3	9	9	8
0	51	8/4	6	9	9	5
0	52	8/4	3	9	9	5
0	53	8/4	8	9	9	7
0	54	8/4	4	9	9	4
0	55	8/4	9	9	9	6
0	56	8/4	7	9	9	7												Grubs Rating (1 to 9)
0	57	8/4	4	9	9	5												EMS treatment		N	Subset for alpha = 0.05
0	58	8/4	4	9	9	4															1
0	59	10/4	8	9	9	7												Student-Newman-Keulsa	.00	100	8.92
0	60	8/4	8	9	9	4													.05	100	8.96
0	61	8/4	3	8	9	3													.15	100	8.97
0	62	10/4	9	9	9	7													.25	100	8.98
0	63	8/4	2	9	9	4													Sig.		0.443977
0	64	10/4	8	9	9	6												Means for groups in homogeneous subsets are displayed.
0	65	8/4	7	9	9	3												a. Uses Harmonic Mean Sample Size = 100.000.
0	66	8/4	6	9	9	4
0	67	8/4	7	9	9	5
0	68	8/4	8	9	9	6
0	69	8/4	5	9	9	6
0	70	8/4	4	9	9	4
0	71	8/4	7	9	9	4
0	72	10/4	9	9	9	8
0	73	8/4	3	9	9	4
0	74	8/4	3	9	9	3
0	75	8/4	3	9	9	4
0	76	8/4	2	9	9	7
0	77	8/4	7	9	9	8
0	78	8/4	8	9	9	4												Mould Rating (1 to 9)
0	79	8/4	4	9	9	4												EMS treatment		N	Subset for alpha = 0.05
0	80	8/4	4	9	9	4															1
0	81	8/4	3	9	9	6												Student-Newman-Keulsa	.00	100	5.94
0	82	10/4	8	9	9	6													.05	100	6.05
0	83	8/4	4	9	9	5													.15	100	6.18
0	84	8/4	4	9	9	5													.25	100	6.42
0	85	8/4	2	9	9	8													Sig.		0.247407
0	86	8/4	8	9	9	7												Means for groups in homogeneous subsets are displayed.
0	87	8/4	9	9	9	6												a. Uses Harmonic Mean Sample Size = 100.000.
0	88	8/4	9	9	9	5
0	89	8/4	2	9	9	9
0	90	8/4	5	9	9	5
0	91	8/4	9	9	9	4
0	92	8/4	3	9	9	8
0	93	8/4	9	9	9	7
0	94	10/4	3	9	9	9
0	95	8/4	7	9	9	6
0	96	8/4	2	9	9	8
0	97	10/4	9	9	7	9
0	98	8/4	3	8	9	8
0	99	8/4	9	9	9	5
0	100	8/4	7	9	7	7
0.05	1	8/4	6	9	9	5
0.05	2	8/4	2	9	9	7
0.05	3	8/4	6	9	9	6
0.05	4	5/4	3	9	9	3
0.05	5	5/4	8	9	9	4
0.05	6	8/4	7	9	9	5
0.05	7	29/3	8	9	9	7
0.05	8	29/3	2	9	9	4
0.05	9	5/4	3	9	9	7
0.05	10	5/4	3	9	9	8
0.05	11	8/4	9	9	9	7
0.05	12	29/3	8	9	9	7
0.05	13	5/4	7	9	9	5
0.05	14	8/4	3	9	9	6
0.05	15	30/3	8	9	9	6
0.05	16	8/4	9	9	9	7
0.05	17	8/4	2	9	9	8
0.05	18	8/4	2	9	9	8
0.05	19	8/4	3	9	9	4
0.05	20	5/4	2	9	9	9
0.05	21	29/3	9	9	9	7
0.05	22	10/4	9	9	9	8
0.05	23	8/4	9	9	9	8
0.05	24	30/3	7	9	9	6
0.05	25	5/4	2	9	7	7
0.05	26	8/4	9	9	9	7
0.05	27	5/4	3	8	9	7
0.05	28	2/4	7	9	9	8
0.05	29	5/4	2	9	9	9
0.05	30	30/3	2	9	9	8
0.05	31	29/3	8	9	9	8
0.05	32	30/3	6	9	9	5
0.05	33	29/3	7	9	9	8
0.05	34	8/4	9	9	9	7
0.05	35	9/4	5	9	9	4
0.05	36	5/4	5	9	9	5
0.05	37	8/4	8	9	9	8
0.05	38	5/4	3	9	9	6
0.05	39	8/4	5	9	9	8
0.05	40	5/4	3	8	9	8
0.05	41	5/4	3	9	9	8
0.05	42	5/4	8	9	9	4
0.05	43	8/4	6	7	9	7
0.05	44	8/4	9	9	9	5
0.05	45	5/4	2	9	9	8
0.05	46	30/3	8	9	9	7
0.05	47	8/4	3	9	9	7
0.05	48	5/4	2	9	9	9
0.05	49	5/4	2	9	9	7
0.05	50	5/4	6	9	9	4
0.05	51	8/4	8	9	9	7
0.05	52	5/4	7	9	9	3
0.05	53	10/4	8	9	9	7
0.05	54	30/3	9	9	9	3
0.05	55	29/3	7	9	9	6
0.05	56	5/4	2	9	9	7
0.05	57	8/4	8	9	9	4
0.05	58	30/3	8	9	9	4
0.05	59	8/4	9	9	8	7
0.05	60	8/4	3	9	9	5
0.05	61	5/4	3	9	9	6
0.05	62	5/4	3	9	9	7
0.05	63	29/3	7	9	9	7
0.05	64	30/3	8	9	9	4
0.05	65	30/3	6	9	9	6
0.05	66	5/4	2	9	9	6
0.05	67	8/4	8	9	9	5
0.05	68	5/4	2	9	9	3
0.05	69	30/3	8	9	9	6
0.05	70	10/4	9	9	9	5
0.05	71	29/3	9	9	9	7
0.05	72	29/3	8	9	9	7
0.05	73	10/4	6	9	9	6
0.05	74	29/3	9	9	9	5
0.05	75	29/3	9	9	9	6
0.05	76	8/4	4	9	9	4
0.05	77	29/3	4	9	9	8
0.05	78	8/4	5	9	9	7
0.05	79	29/3	7	9	9	7
0.05	80	29/3	9	9	9	7
0.05	81	29/3	4	9	9	6
0.05	82	29/3	4	9	9	6
0.05	83	29/3	4	9	9	7
0.05	84	8/4	9	9	9	4
0.05	85	29/3	5	9	9	5
0.05	86	29/3	2	9	9	5
0.05	87	10/4	9	9	9	4
0.05	88	29/3	4	9	9	4
0.05	89	29/3	7	9	9	6
0.05	90	29/3	2	9	9	3
0.05	91	8/4	9	9	9	7
0.05	92	29/3	2	9	9	4
0.05	93	8/4	4	9	9	6
0.05	94	29/3	7	9	9	5
0.05	95	29/3	8	9	9	4
0.05	96	29/3	6	9	9	2
0.05	97	5/4	3	9	9	6
0.05	98	29/3	9	9	9	6
0.05	99	29/3	9	9	8	6
0.05	100	29/3	2	9	9	6
0.15	1	10/4	9	8	9	4
0.15	2	8/4	6	9	9	6
0.15	3	5/4	9	9	9	7
0.15	4	8/4	7	9	9	9
0.15	5	8/4	6	9	9	9
0.15	6	8/4	2	9	9	9
0.15	7	8/4	4	9	9	4
0.15	8	10/4	5	9	9	4
0.15	9	5/4	2	9	9	9
0.15	10	5/4	7	9	9	9
0.15	11	8/4	3	9	9	9
0.15	12	5/4	8	9	9	6
0.15	13	5/4	3	9	9	4
0.15	14	8/4	2	6	9	4
0.15	15	8/4	6	9	9	4
0.15	16	8/4	3	9	9	9
0.15	17	29/3	2	9	9	9
0.15	18	29/3	9	9	9	6
0.15	19	10/4	9	9	9	8
0.15	20	8/4	3	9	9	6
0.15	21	8/4	9	9	9	4
0.15	22	8/4	9	9	9	3
0.15	23	10/4	9	9	9	5
0.15	24	8/4	7	9	9	8
0.15	25	8/4	2	9	9	9
0.15	26	8/4	4	9	9	3
0.15	27	8/4	7	9	9	9
0.15	28	8/4	4	9	9	3
0.15	29	8/4	4	9	9	6
0.15	30	8/4	7	9	9	9
0.15	31	8/4	2	8	8	8
0.15	32	8/4	4	7	9	9
0.15	33	10/4	9	9	9	8
0.15	34	8/4	9	9	9	5
0.15	35	8/4	3	9	9	7
0.15	36	8/4	3	9	9	3
0.15	37	8/4	7	9	9	5
0.15	38	8/4	9	9	9	8
0.15	39	8/4	8	9	9	7
0.15	40	8/4	3	9	9	4
0.15	41	29/3	9	9	9	4
0.15	42	8/4	9	9	9	4
0.15	43	8/4	9	9	9	8
0.15	44	29/3	9	9	9	6
0.15	45	8/4	9	9	9	4
0.15	46	8/4	9	9	9	4
0.15	47	8/4	3	9	9	8
0.15	48	8/4	2	9	9	7
0.15	49	30/3	2	9	7	8
0.15	50	10/4	9	9	9	9
0.15	51	8/4	4	9	9	2
0.15	52	8/4	9	9	9	7
0.15	53	8/4	9	9	9	6
0.15	54	8/4	8	9	9	9
0.15	55	8/4	8	9	9	4
0.15	56	10/4	8	9	9	8
0.15	57	8/4	5	9	9	5
0.15	58	10/4	9	9	9	7
0.15	59	8/4	4	9	9	2
0.15	60	8/4	2	9	9	7
0.15	61	8/4	8	9	9	3
0.15	62	8/4	9	7	9	5
0.15	63	29/3	9	9	9	8
0.15	64	29/3	9	9	9	6
0.15	65	8/4	2	9	9	6
0.15	66	29/3	8	9	9	6
0.15	67	8/4	7	9	9	6
0.15	68	8/4	6	9	9	5
0.15	69	29/3	7	9	9	7
0.15	70	29/3	9	9	9	6
0.15	71	8/4	9	9	9	3
0.15	72	8/4	2	9	9	7
0.15	73	8/4	9	9	9	5
0.15	74	8/4	2	9	9	7
0.15	75	29/3	2	9	9	5
0.15	76	29/3	9	9	9	5
0.15	77	8/4	3	9	9	8
0.15	78	30/3	9	9	9	5
0.15	79	8/4	3	9	9	4
0.15	80	29/3	3	9	9	7
0.15	81	8/4	3	9	9	7
0.15	82	8/4	3	9	9	7
0.15	83	29/3	9	9	9	6
0.15	84	29/3	5	9	9	7
0.15	85	29/3	9	9	9	7
0.15	86	29/3	2	9	9	7
0.15	87	8/4	5	9	9	6
0.15	88	29/3	9	9	9	6
0.15	89	29/3	6	9	9	7
0.15	90	29/3	4	9	9	7
0.15	91	29/3	9	9	9	5
0.15	92	8/4	2	9	9	7
0.15	93	29/3	9	9	9	6
0.15	94	29/3	4	9	9	7
0.15	95	8/4	7	9	9	8
0.15	96	30/3	7	9	9	7
0.15	97	29/3	7	9	9	6
0.15	98	8/4	5	9	9	5
0.15	99	8/4	6	9	9	4
0.15	100	29/3	3	9	9	5
0.25	1	5/4	4	9	9	4
0.25	2	30/3	4	9	9	9
0.25	3	8/4	9	9	9	9
0.25	4	5/4	9	9	9	3
0.25	5	8/4	9	9	9	3
0.25	6	5/4	3	9	9	3
0.25	7	8/4	9	9	9	3
0.25	8	5/4	8	9	9	8
0.25	9	8/4	9	9	9	6
0.25	10	5/4	2	9	9	9
0.25	11	5/4	7	9	7	9
0.25	12	5/4	3	9	9	4
0.25	13	5/4	7	4	9	9
0.25	14	30/3	2	9	9	9
0.25	15	5/4	2	8	9	9
0.25	16	5/4	4	8	9	9
0.25	17	8/4	9	9	9	6
0.25	18	8/4	5	9	9	8
0.25	19	5/4	6	9	9	3
0.25	20	8/4	8	9	9	8
0.25	21	5/4	2	9	9	9
0.25	22	30/3	4	9	9	6
0.25	23	30/3	3	9	9	9
0.25	24	5/4	8	9	9	6
0.25	25	5/4	4	9	9	5
0.25	26	5/4	8	9	9	9
0.25	27	8/4	9	9	9	6
0.25	28	5/4	4	7	9	2
0.25	29	5/4	6	9	9	7
0.25	30	8/4	7	9	9	4
0.25	31	5/4	2	9	9	6
0.25	32	5/4	3	9	9	9
0.25	33	5/4	5	9	9	4
0.25	34	5/4	2	9	9	6
0.25	35	8/4	2	9	9	8
0.25	36	5/4	3	9	9	8
0.25	37	8/4	8	9	9	6
0.25	38	5/4	2	9	9	9
0.25	39	5/4	3	9	9	4
0.25	40	8/4	8	8	9	9
0.25	41	5/4	7	9	9	6
0.25	42	5/4	6	9	9	9
0.25	43	5/4	2	9	9	9
0.25	44	8/4	8	9	9	7
0.25	45	8/4	7	9	9	6
0.25	46	5/4	8	8	9	9
0.25	47	5/4	8	9	9	9
0.25	48	5/4	4	9	9	4
0.25	49	8/4	6	9	9	6
0.25	50	5/4	9	9	9	6
0.25	51	5/4	5	9	9	7
0.25	52	8/4	9	9	9	3
0.25	53	8/4	4	9	9	6
0.25	54	8/4	9	9	9	7
0.25	55	5/4	9	8	9	8
0.25	56	8/4	8	9	9	8
0.25	57	8/4	6	9	9	3
0.25	58	8/4	9	9	9	4
0.25	59	8/4	4	9	9	6
0.25	60	8/4	5	9	9	8
0.25	61	8/4	2	9	9	9
0.25	62	5/4	4	9	9	3
0.25	63	5/4	8	9	9	3
0.25	64	5/4	2	9	9	6
0.25	65	8/4	9	8	9	4
0.25	66	8/4	5	9	9	5
0.25	67	5/4	6	9	9	4
0.25	68	30/3	8	9	9	6
0.25	69	8/4	9	9	9	4
0.25	70	8/4	2	9	9	8
0.25	71	30/3	5	9	9	7
0.25	72	8/4	9	9	9	9
0.25	73	5/4	5	9	9	7
0.25	74	5/4	6	9	9	7
0.25	75	30/3	7	9	9	8
0.25	76	5/4	4	9	9	4
0.25	77	8/4	9	9	9	7
0.25	78	5/4	9	9	9	9
0.25	79	8/4	9	9	9	5
0.25	80	8/4	8	9	9	8
0.25	81	30/3	7	4	9	5
0.25	82	30/3	8	9	9	7
0.25	83	5/4	4	9	9	6
0.25	84	8/4	9	9	9	8
0.25	85	30/3	9	9	9	7
0.25	86	5/4	4	9	9	6
0.25	87	8/4	5	9	9	8
0.25	88	30/3	2	9	9	6
0.25	89	8/4	2	9	9	7
0.25	90	30/3	9	9	9	7
0.25	91	30/3	9	9	9	6
0.25	92	5/4	4	9	9	7
0.25	93	5/4	6	9	9	6
0.25	94	30/3	3	9	9	5
0.25	95	5/4	8	9	9	6
0.25	96	30/3	3	9	9	4
0.25	97	30/3	7	9	9	8
0.25	98	8/4	9	9	9	6			Mould	Grubs	Ergot	Aphids
0.25	99	5/4	7	9	9	4		0
0.25	100	5/4	4	9	9	6		0.05
								0.15
								0.25
								Total Number of Clean Heads	48	390	379	99
								%	0.12	0.975	0.9475	0.2475
									88	2.5	5.25	75.25
								Pest	% Effected Heads
								Mould	88
								Grubs	2.5
								Ergot	5.25
								Aphids	75.25

## Sheet: Figure1c_data_and_stats
Collated plant Height Data
EMS Treatment (%)	Height	Date of Observation
0	50	2021-02-26
0	42	2021-02-26
0	42	2021-02-26
0	55	2021-02-26																	Date of data collection	No. of observations
0	40	2021-02-26																	2021-02-26	5
0.05	32	2021-02-26																	2021-03-17	5
0.05	40	2021-02-26																	2021-04-14	5
0.05	34	2021-02-26																	2021-05-11	100
0.05	45	2021-02-26
0.05	38	2021-02-26
0.15	45	2021-02-26
0.15	35	2021-02-26
0.15	38	2021-02-26
0.15	15	2021-02-26
0.15	30	2021-02-26
0.25	36	2021-02-26
0.25	31	2021-02-26
0.25	21	2021-02-26
0.25	28	2021-02-26
0.25	34	2021-02-26
0	90	2021-03-17
0	101	2021-03-17
0	110	2021-03-17
0	90	2021-03-17
0	78	2021-03-17
0.05	87	2021-03-17
0.05	87	2021-03-17
0.05	68	2021-03-17
0.05	67	2021-03-17
0.05	90	2021-03-17
0.15	65	2021-03-17
0.15	63	2021-03-17
0.15	60	2021-03-17
0.15	69	2021-03-17
0.15	60	2021-03-17
0.25	50	2021-03-17
0.25	42	2021-03-17
0.25	77	2021-03-17
0.25	60	2021-03-17
0.25	60	2021-03-17
0	140	2021-04-14
0	130	2021-04-14
0	160	2021-04-14
0	140	2021-04-14
0	160	2021-04-14
0.05	120	2021-04-14
0.05	125	2021-04-14
0.05	125	2021-04-14
0.05	125	2021-04-14
0.05	130	2021-04-14				ANOVA
0.15	120	2021-04-14				Height
0.15	125	2021-04-14					Sum of Squares	df	Mean Square	F	Sig.
0.15	110	2021-04-14				Between Groups	25741.8	3	8580.59	38.9674	4.37467e-22
0.15	97	2021-04-14				Within Groups	87198.9	396	220.199
0.15	135	2021-04-14				Total	112941	399
0.25	105	2021-04-14
0.25	105	2021-04-14				Height
0.25	105	2021-04-14				EMS Treatment (%)		N	Subset for alpha = 0.05
0.25	100	2021-04-14							1	2	3	4
0.25	95	2021-04-14				Student-Newman-Keulsa	.25	100	122.35
0	143	2021-05-11					.15	100		127.85
0	141	2021-05-11					.05	100			138.1
0	160	2021-05-11					.00	100				142.58
0	139	2021-05-11					Sig.		1	1	1	1
0	133	2021-05-11				Waller-Duncana,b	.25	100	122.35
0	134	2021-05-11					.15	100		127.85
0	135	2021-05-11					.05	100			138.1
0	162	2021-05-11					.00	100				142.58
0	129	2021-05-11				Means for groups in homogeneous subsets are displayed.
0	151	2021-05-11				a. Uses Harmonic Mean Sample Size = 100.000.
0	168	2021-05-11				b. Type 1/Type 2 Error Seriousness Ratio = 100.
0	168	2021-05-11
0	150	2021-05-11				Multiple Comparisons
0	140	2021-05-11				Dependent Variable:	Height
0	155	2021-05-11				(I) EMS Treatment (%)			Mean Difference (I-J)	Std. Error	Sig.	95% Confidence Interval
0	130	2021-05-11										Lower Bound	Upper Bound
0	130	2021-05-11				LSD	.00	.05	4.48000*	2.09857	0.0333915	0.354275	8.60572
0	160	2021-05-11						.15	14.73000*	2.09857	9.75402e-12	10.6043	18.8557
0	150	2021-05-11						.25	20.23000*	2.09857	6.79214e-20	16.1043	24.3557
0	150	2021-05-11					.05	.00	-4.48000*	2.09857	0.0333915	-8.60572	-0.354275
0	165	2021-05-11						.15	10.25000*	2.09857	1.50923e-06	6.12428	14.3757
0	145	2021-05-11						.25	15.75000*	2.09857	4.09169e-13	11.6243	19.8757
0	150	2021-05-11					.15	.00	-14.73000*	2.09857	9.75402e-12	-18.8557	-10.6043
0	140	2021-05-11						.05	-10.25000*	2.09857	1.50923e-06	-14.3757	-6.12428
0	135	2021-05-11						.25	5.50000*	2.09857	0.0091091	1.37428	9.62572
0	125	2021-05-11					.25	.00	-20.23000*	2.09857	6.79214e-20	-24.3557	-16.1043
0	130	2021-05-11						.05	-15.75000*	2.09857	4.09169e-13	-19.8757	-11.6243
0	115	2021-05-11						.15	-5.50000*	2.09857	0.0091091	-9.62572	-1.37428
0	150	2021-05-11				*. The mean difference is significant at the 0.05 level.
0	125	2021-05-11
0	150	2021-05-11
0	135	2021-05-11
0	145	2021-05-11
0	150	2021-05-11
0	140	2021-05-11
0	145	2021-05-11
0	135	2021-05-11
0	115	2021-05-11
0	155	2021-05-11
0	150	2021-05-11
0	115	2021-05-11
0	110	2021-05-11
0	120	2021-05-11
0	155	2021-05-11
0	145	2021-05-11
0	160	2021-05-11
0	120	2021-05-11
0	115	2021-05-11
0	110	2021-05-11
0	135	2021-05-11
0	150	2021-05-11
0	140	2021-05-11
0	135	2021-05-11
0	140	2021-05-11
0	150	2021-05-11
0	140	2021-05-11
0	165	2021-05-11
0	130	2021-05-11
0	140	2021-05-11
0	135	2021-05-11
0	135	2021-05-11
0	145	2021-05-11
0	140	2021-05-11
0	130	2021-05-11
0	140	2021-05-11
0	135	2021-05-11
0	145	2021-05-11
0	150	2021-05-11
0	155	2021-05-11
0	155	2021-05-11
0	160	2021-05-11
0	145	2021-05-11
0	145	2021-05-11
0	150	2021-05-11
0	150	2021-05-11
0	130	2021-05-11
0	125	2021-05-11
0	130	2021-05-11
0	140	2021-05-11
0	145	2021-05-11
0	155	2021-05-11
0	145	2021-05-11
0	140	2021-05-11
0	160	2021-05-11
0	165	2021-05-11
0	160	2021-05-11
0	165	2021-05-11
0	160	2021-05-11
0	135	2021-05-11
0	150	2021-05-11
0	155	2021-05-11
0	155	2021-05-11
0	150	2021-05-11
0	130	2021-05-11
0	140	2021-05-11
0	120	2021-05-11
0	140	2021-05-11
0	145	2021-05-11
0	165	2021-05-11
0	135	2021-05-11
0.05	140	2021-05-11
0.05	145	2021-05-11
0.05	155	2021-05-11
0.05	165	2021-05-11
0.05	135	2021-05-11
0.05	145	2021-05-11
0.05	150	2021-05-11
0.05	150	2021-05-11
0.05	135	2021-05-11
0.05	130	2021-05-11
0.05	130	2021-05-11
0.05	145	2021-05-11
0.05	125	2021-05-11
0.05	140	2021-05-11
0.05	125	2021-05-11
0.05	130	2021-05-11
0.05	110	2021-05-11
0.05	135	2021-05-11
0.05	120	2021-05-11
0.05	125	2021-05-11
0.05	165	2021-05-11
0.05	145	2021-05-11
0.05	160	2021-05-11
0.05	135	2021-05-11
0.05	130	2021-05-11
0.05	145	2021-05-11
0.05	140	2021-05-11
0.05	140	2021-05-11
0.05	165	2021-05-11
0.05	130	2021-05-11
0.05	150	2021-05-11
0.05	135	2021-05-11
0.05	125	2021-05-11
0.05	135	2021-05-11
0.05	130	2021-05-11
0.05	130	2021-05-11
0.05	125	2021-05-11
0.05	130	2021-05-11
0.05	150	2021-05-11
0.05	145	2021-05-11
0.05	145	2021-05-11
0.05	150	2021-05-11
0.05	145	2021-05-11
0.05	145	2021-05-11
0.05	125	2021-05-11
0.05	125	2021-05-11
0.05	145	2021-05-11
0.05	150	2021-05-11
0.05	150	2021-05-11
0.05	150	2021-05-11
0.05	145	2021-05-11
0.05	140	2021-05-11
0.05	145	2021-05-11
0.05	140	2021-05-11
0.05	155	2021-05-11
0.05	135	2021-05-11
0.05	155	2021-05-11
0.05	145	2021-05-11
0.05	125	2021-05-11
0.05	150	2021-05-11
0.05	150	2021-05-11
0.05	135	2021-05-11
0.05	130	2021-05-11
0.05	120	2021-05-11
0.05	140	2021-05-11
0.05	145	2021-05-11
0.05	140	2021-05-11
0.05	100	2021-05-11
0.05	120	2021-05-11
0.05	145	2021-05-11
0.05	155	2021-05-11
0.05	95	2021-05-11
0.05	110	2021-05-11
0.05	140	2021-05-11
0.05	115	2021-05-11
0.05	170	2021-05-11
0.05	145	2021-05-11
0.05	145	2021-05-11
0.05	135	2021-05-11
0.05	125	2021-05-11
0.05	145	2021-05-11
0.05	130	2021-05-11
0.05	135	2021-05-11
0.05	140	2021-05-11
0.05	125	2021-05-11
0.05	115	2021-05-11
0.05	115	2021-05-11
0.05	150	2021-05-11
0.05	120	2021-05-11
0.05	120	2021-05-11
0.05	140	2021-05-11
0.05	135	2021-05-11
0.05	145	2021-05-11
0.05	160	2021-05-11
0.05	155	2021-05-11
0.05	155	2021-05-11
0.05	140	2021-05-11
0.05	135	2021-05-11
0.05	140	2021-05-11
0.05	140	2021-05-11
0.15	130	2021-05-11
0.15	145	2021-05-11
0.15	120	2021-05-11
0.15	140	2021-05-11
0.15	145	2021-05-11
0.15	140	2021-05-11
0.15	130	2021-05-11
0.15	130	2021-05-11
0.15	140	2021-05-11
0.15	140	2021-05-11
0.15	125	2021-05-11
0.15	135	2021-05-11
0.15	125	2021-05-11
0.15	130	2021-05-11
0.15	130	2021-05-11
0.15	110	2021-05-11
0.15	115	2021-05-11
0.15	125	2021-05-11
0.15	145	2021-05-11
0.15	125	2021-05-11
0.15	150	2021-05-11
0.15	150	2021-05-11
0.15	100	2021-05-11
0.15	110	2021-05-11
0.15	115	2021-05-11
0.15	140	2021-05-11
0.15	120	2021-05-11
0.15	140	2021-05-11
0.15	120	2021-05-11
0.15	120	2021-05-11
0.15	155	2021-05-11
0.15	150	2021-05-11
0.15	125	2021-05-11
0.15	140	2021-05-11
0.15	120	2021-05-11
0.15	125	2021-05-11
0.15	120	2021-05-11
0.15	150	2021-05-11
0.15	100	2021-05-11
0.15	140	2021-05-11
0.15	145	2021-05-11
0.15	145	2021-05-11
0.15	160	2021-05-11
0.15	150	2021-05-11
0.15	125	2021-05-11
0.15	120	2021-05-11
0.15	115	2021-05-11
0.15	165	2021-05-11
0.15	140	2021-05-11
0.15	115	2021-05-11
0.15	120	2021-05-11
0.15	135	2021-05-11
0.15	110	2021-05-11
0.15	105	2021-05-11
0.15	130	2021-05-11
0.15	130	2021-05-11
0.15	170	2021-05-11
0.15	145	2021-05-11
0.15	100	2021-05-11
0.15	110	2021-05-11
0.15	85	2021-05-11
0.15	130	2021-05-11
0.15	140	2021-05-11
0.15	130	2021-05-11
0.15	140	2021-05-11
0.15	120	2021-05-11
0.15	125	2021-05-11
0.15	140	2021-05-11
0.15	135	2021-05-11
0.15	130	2021-05-11
0.15	130	2021-05-11
0.15	120	2021-05-11
0.15	115	2021-05-11
0.15	115	2021-05-11
0.15	95	2021-05-11
0.15	100	2021-05-11
0.15	110	2021-05-11
0.15	120	2021-05-11
0.15	105	2021-05-11
0.15	145	2021-05-11
0.15	100	2021-05-11
0.15	125	2021-05-11
0.15	110	2021-05-11
0.15	120	2021-05-11
0.15	100	2021-05-11
0.15	130	2021-05-11
0.15	135	2021-05-11
0.15	120	2021-05-11
0.15	115	2021-05-11
0.15	115	2021-05-11
0.15	145	2021-05-11
0.15	130	2021-05-11
0.15	135	2021-05-11
0.15	130	2021-05-11
0.15	130	2021-05-11
0.15	140	2021-05-11
0.15	135	2021-05-11
0.15	125	2021-05-11
0.15	130	2021-05-11
0.15	135	2021-05-11
0.25	115	2021-05-11
0.25	90	2021-05-11
0.25	125	2021-05-11
0.25	115	2021-05-11
0.25	95	2021-05-11
0.25	115	2021-05-11
0.25	165	2021-05-11
0.25	125	2021-05-11
0.25	105	2021-05-11
0.25	125	2021-05-11
0.25	145	2021-05-11
0.25	120	2021-05-11
0.25	120	2021-05-11
0.25	125	2021-05-11
0.25	85	2021-05-11
0.25	140	2021-05-11
0.25	110	2021-05-11
0.25	120	2021-05-11
0.25	120	2021-05-11
0.25	125	2021-05-11
0.25	115	2021-05-11
0.25	120	2021-05-11
0.25	135	2021-05-11
0.25	115	2021-05-11
0.25	130	2021-05-11
0.25	145	2021-05-11
0.25	130	2021-05-11
0.25	120	2021-05-11
0.25	95	2021-05-11
0.25	105	2021-05-11
0.25	125	2021-05-11
0.25	140	2021-05-11
0.25	145	2021-05-11
0.25	150	2021-05-11
0.25	125	2021-05-11
0.25	120	2021-05-11
0.25	95	2021-05-11
0.25	100	2021-05-11
0.25	135	2021-05-11
0.25	130	2021-05-11
0.25	100	2021-05-11
0.25	120	2021-05-11
0.25	115	2021-05-11
0.25	110	2021-05-11
0.25	125	2021-05-11
0.25	120	2021-05-11
0.25	125	2021-05-11
0.25	110	2021-05-11
0.25	130	2021-05-11
0.25	135	2021-05-11
0.25	120	2021-05-11
0.25	90	2021-05-11
0.25	95	2021-05-11
0.25	125	2021-05-11
0.25	130	2021-05-11
0.25	130	2021-05-11
0.25	140	2021-05-11
0.25	100	2021-05-11
0.25	95	2021-05-11
0.25	110	2021-05-11
0.25	115	2021-05-11
0.25	145	2021-05-11
0.25	120	2021-05-11
0.25	135	2021-05-11
0.25	100	2021-05-11
0.25	125	2021-05-11
0.25	125	2021-05-11
0.25	140	2021-05-11
0.25	140	2021-05-11
0.25	110	2021-05-11
0.25	145	2021-05-11
0.25	120	2021-05-11
0.25	170	2021-05-11
0.25	140	2021-05-11
0.25	115	2021-05-11
0.25	130	2021-05-11
0.25	110	2021-05-11
0.25	130	2021-05-11
0.25	120	2021-05-11
0.25	115	2021-05-11
0.25	110	2021-05-11
0.25	90	2021-05-11
0.25	130	2021-05-11
0.25	130	2021-05-11
0.25	135	2021-05-11
0.25	130	2021-05-11
0.25	125	2021-05-11
0.25	135	2021-05-11
0.25	115	2021-05-11
0.25	130	2021-05-11
0.25	125	2021-05-11
0.25	125	2021-05-11
0.25	115	2021-05-11
0.25	125	2021-05-11
0.25	130	2021-05-11
0.25	145	2021-05-11
0.25	135	2021-05-11
0.25	135	2021-05-11
0.25	105	2021-05-11
0.25	130	2021-05-11

## Sheet: Figure2a_data_and_stats
0.00 CP	0.00 OP	0.05 CP	0.05 OP	0.15 CP	0.15 OP	0.25 CP	0.25 OP
50.41	13.27	2.41	6.72	0	0.13	0	0.13		100 observation for each treatment group (control, 0.05, 0.15 and 0.25% treatment group)
19.85	52.63	30.01	14.6	0	25.33	0	0.14		Open pollinated and closed pollinated bags also compared in each comparison.
42.14	28.46	12.04	7.75	0	17.81	0	12.64
17.84	10.28	17.89	4.91	0	1.64	0	0
19.39	38.56	30.87	52.19	0	0.18	0	0
39.69	65.32	25.11	26.62	0.9	0.93	0	0.14
52.22	12.78	6.33	18.28	1.22	28.21	0	0				Seed collected seperately for mutation comparison (# 1 to 12 in order)
18.31	47.33	39.7	11.41	7.28	2.05	0	2.8
43.58	25.86	14.67	19.29	12.78	3.05	0	0.33
44.18	50.18	37.25	32.23	3.51	0.93	0	0.31
13.29	14.46	33.83	17.09	15.46	0	0	2.45
20.34	40.46	22.51	42.3	1.35	0.6	0	0
16.96	18.08	39.89	45.96	4.66	0.84	0	0
34.09	45.43	41.7	44.03	1.9	39.77	0	0
22.09	29.62	12.52	10.53	3.73	0.06	0	0.38
13.33	13.4	25.91	21.09	3.85	4.72	0	0
9.79	13.56	29.45	13.23	3.99	14.08	0	1.01
13.78	22.41	29.68	32.03	7.33	4.16	0	0
29.57	58.63	7.29	9.49	2.25	0.57	0	11.84
22.97	37.21	21	16.61	3.39	1.27	0	1.66
13.77	58.55	41.68	9.01	0.6	0.25	0	4.34
16.92	86.27	30.91	0.91	0.35	3.1	0	0
18.47	25.93	43.95	10.81	28.5	1.11	0	0.48
51.62	23.23	32.47	12.59	5.88	8.32	0	1.01
13.72	56.85	53.18	8.3	4.17	0.85	0	0
34.58	47.43	17.63	15.3	0.42	0.35	0	0.74
25.99	35.22	25.59	3.96	27.55	1.12	0	0
26.63	35.27	19.31	16.96	0.56	3.1	0	1.18
15.57	26.33	31.3	7.31	0.03	4.91	0	0
14.4	60.86	9.1	26.19	1.97	0.12	0	0.16
18.8	24.08	6.36	2.28	2.78	0.49	0	0.61
62.98	29.55	25.99	18.95	0.8	0.16	0	0
32.25	83.31	58.57	25.23	22.8	0.32	0	0.01
35.03	23.17	22.15	22.57	2.47	0.46	0	0
25.3	26.29	36.24	0.86	2.84	0.33	0.03	0.06
52.38	26.58	5	39.86	0.18	0.07	0.95	0
20.39	62.79	8.54	38.24	0.09	0.6	0.18	0
9.73	56.01	47.6	55.84	1.43	0.47	0.75	0
16.65	41.71	28.58	37.28	8.65	0.04	0.24	2.29
25.36	39.73	50.68	28.03	1.17	0.22	0.19	1.52
28.13	15.49	67.94	29.26	0.48	0.36	1.17	0
61.4	44.11	33.46	46.44	18.59	0	5.09	9.12
31.04	28.03	14.91	20.98	5.61	0.18	10.43	0.99
15.74	49.56	47.76	19.1	7.11	0.09	0.29	1.84
46.17	42.33	26.75	35.8	17.54	0	1.89	2.04
15.44	15.15	28.63	1.49	1.54	1.84	2.27	0.02
29.17	55.89	18.94	18.29	1.63	7.09	0.13	0
35.49	46.33	45.39	6.66	0.26	0.55	0.23	0
17.92	60.57	9.68	51.3	2.4	0.73	5.55	0.4
17.5	33.56	20.77	14.05	1.4	0.25	3.53	0
21.11	32.36	23.79	6.5	0.73	24.24	5.38	0
21.91	66.83	32.14	13.75	9.35	4.51	1.78	2.42
19.38	45.1	59.34	26.73	0.34	1.18	1.1	0.12
17.42	36.26	23.61	26.69	0.14	0.5	0.15	0.19
42.44	25.52	35.69	5	0.4	38.03	0.03	0
42.28	45.57	4.61	17.13	3.14	17.2	0.24	8.91
42.09	67.14	33.4	33.76	8.67	1.49	0.06	0.17
59.24	31.88	31.65	47.16	0.56	0.19	0.03	0
43.93	41.83	54.58	22.54	3.48	1.97	0.6	0
47.12	27.1	12.85	9.66	0.65	2.43	0.07	0.02
62.28	25.31	46.31	33.09	6.18	8.05	0.63	0.03
12.51	43.22	41.93	3.59	2.75	5.2	3.08	0.17
34.26	56.94	35.3	3.55	0.16	23.16	0.53	0
20.11	16.66	18.32	12.72	0.12	1.16	0.45	0
26.93	92.1	0.38	15.67	0.05	0.05	0.03	0
19.37	28.57	10.22	15.85	0.1	15.03	0.03	0
54.05	36.04	15.86	41.61	1.73	0.72	5.49	0
24.99	37.57	13.97	10.33	2.43	1.8	0.16	1.21
27.48	25.95	25.22	43.11	0.31	0.13	7.04	0
47.91	23.74	33.36	22.35	1.01	1.45	0.03	0.08
57.87	9.86	31.03	5.74	3.25	0.9	2.06	0
58.71	18.29	7.28	21.33	1.12	0.38	0.03	0
38.45	47.6	29.37	27.05	11.65	1.88	22.3	0.08
22.24	35.63	10.87	16.59	0.29	0.71	2.77	1.2
46.1	34.63	45.7	12.81	2.68	0.98	2.84	2.01
35.14	56.74	42.41	20.66	0.38	0.29	2.93	0.02
37.39	37.1	32.24	14.66	0.03	0.23	0.06	0
33.48	34.32	10.36	29.77	2.95	0.16	0.1	0.3
27.1	42.88	16.31	10.24	1.29	0.06	0.26	0.02
48.25	36.24	36.32	22.06	37.69	43	0.74	0.24
29.56	57.42	8.1	7.4	0.55	4.59	0.15	0
23.01	92.97	40.41	8.35	17.1	0.12	0.45	0.15
28.45	29.5	5.55	8.43	0.2	2.08	0.67	0.16
41.21	31.81	34.78	9.26	0.1	7.36	2.1	0.06
21.03	49.5	25.78	28.61	2.47	0.42	0.29	0.03
33.13	35.96	17.16	44.83	0.71	0.09	7.02	0.07
38.5	32.73	20.95	45.53	0.67	0.41	2.34	0.89
63.43	34.12	22.15	33.73	4.88	0.2	2.06	1.38
17.5	21.41	23.14	19.03	6.01	0.05	1.29	1.73
29.81	21.14	3.27	38.53	4.79		1.27	2.25
66.83	42.52	24.22	1.8	0.4		8.72	0.07
24.55	37.9	36.58	53.62	5.83		1.88	2.37
26.32	30.83	23.47	18.06	0.27		3.46	0.34
10.83	31.69	25.78	8.31	11.44		10.86	3.39
52.63	24.31	32.27	31.39	0.75		0.03	3.77
42.87	13.54	54.89	19.84	7.18		4.12	0.58
42.87	61.88	23.13		1.01		0.08	2.49
22.96	10.05			29.56		0.08	0.26
25.34	43.12			0.08		0.32
															Bagged	Unbagged	Bagged	Unbagged	Bagged	Unbagged	Bagged	Unbagged
Treatment Numerical ID	EMS treatment & Close or Open Poll	Seed weight (g)													Control		0.05		0.15		0.25
1	0.00 CP	50.41	CP=bagged (closed pollination)
1	0.00 CP	19.85	OP=non-bagged (open pollination)
1	0.00 CP	42.14
1	0.00 CP	17.84
1	0.00 CP	19.39
1	0.00 CP	39.69
1	0.00 CP	52.22
1	0.00 CP	18.31
1	0.00 CP	43.58
1	0.00 CP	44.18
1	0.00 CP	13.29
1	0.00 CP	20.34
1	0.00 CP	16.96
1	0.00 CP	34.09
1	0.00 CP	22.09
1	0.00 CP	13.33
1	0.00 CP	9.79
1	0.00 CP	13.78
1	0.00 CP	29.57
1	0.00 CP	22.97
1	0.00 CP	13.77
1	0.00 CP	16.92
1	0.00 CP	18.47
1	0.00 CP	51.62		One way ANOVA and post hoc testing
1	0.00 CP	13.72
1	0.00 CP	34.58
1	0.00 CP	25.99
1	0.00 CP	26.63
1	0.00 CP	15.57
1	0.00 CP	14.4
1	0.00 CP	18.8
1	0.00 CP	62.98
1	0.00 CP	32.25
1	0.00 CP	35.03
1	0.00 CP	25.3
1	0.00 CP	52.38
1	0.00 CP	20.39
1	0.00 CP	9.73
1	0.00 CP	16.65
1	0.00 CP	25.36
1	0.00 CP	28.13
1	0.00 CP	61.4
1	0.00 CP	31.04
1	0.00 CP	15.74
1	0.00 CP	46.17
1	0.00 CP	15.44
1	0.00 CP	29.17
1	0.00 CP	35.49
1	0.00 CP	17.92
1	0.00 CP	17.5
1	0.00 CP	21.11
1	0.00 CP	21.91
1	0.00 CP	19.38
1	0.00 CP	17.42
1	0.00 CP	42.44
1	0.00 CP	42.28
1	0.00 CP	42.09
1	0.00 CP	59.24
1	0.00 CP	43.93
1	0.00 CP	47.12
1	0.00 CP	62.28
1	0.00 CP	12.51
1	0.00 CP	34.26
1	0.00 CP	20.11
1	0.00 CP	26.93
1	0.00 CP	19.37
1	0.00 CP	54.05
1	0.00 CP	24.99
1	0.00 CP	27.48
1	0.00 CP	47.91
1	0.00 CP	57.87
1	0.00 CP	58.71
1	0.00 CP	38.45
1	0.00 CP	22.24
1	0.00 CP	46.1
1	0.00 CP	35.14
1	0.00 CP	37.39
1	0.00 CP	33.48
1	0.00 CP	27.1
1	0.00 CP	48.25
1	0.00 CP	29.56
1	0.00 CP	23.01
1	0.00 CP	28.45
1	0.00 CP	41.21
1	0.00 CP	21.03
1	0.00 CP	33.13
1	0.00 CP	38.5
1	0.00 CP	63.43
1	0.00 CP	17.5
1	0.00 CP	29.81
1	0.00 CP	66.83
1	0.00 CP	24.55
1	0.00 CP	26.32		Based on these tests, as expected there was significant difference between the treatment groups Control to 0.25
1	0.00 CP	10.83		based on a Waller-Duncan post hoc test. There was a
1	0.00 CP	52.63
1	0.00 CP	42.87		Basic stats between groups
1	0.00 CP	42.87
1	0.00 CP	22.96
1	0.00 CP	25.34
2	0.00 OP	13.27
2	0.00 OP	52.63
2	0.00 OP	28.46
2	0.00 OP	10.28
2	0.00 OP	38.56
2	0.00 OP	65.32
2	0.00 OP	12.78
2	0.00 OP	47.33
2	0.00 OP	25.86
2	0.00 OP	50.18
2	0.00 OP	14.46
2	0.00 OP	40.46
2	0.00 OP	18.08
2	0.00 OP	45.43
2	0.00 OP	29.62
2	0.00 OP	13.4
2	0.00 OP	13.56
2	0.00 OP	22.41
2	0.00 OP	58.63
2	0.00 OP	37.21
2	0.00 OP	58.55
2	0.00 OP	86.27
2	0.00 OP	25.93
2	0.00 OP	23.23
2	0.00 OP	56.85
2	0.00 OP	47.43
2	0.00 OP	35.22
2	0.00 OP	35.27
2	0.00 OP	26.33
2	0.00 OP	60.86
2	0.00 OP	24.08
2	0.00 OP	29.55
2	0.00 OP	83.31
2	0.00 OP	23.17
2	0.00 OP	26.29
2	0.00 OP	26.58
2	0.00 OP	62.79
2	0.00 OP	56.01
2	0.00 OP	41.71
2	0.00 OP	39.73
2	0.00 OP	15.49
2	0.00 OP	44.11
2	0.00 OP	28.03
2	0.00 OP	49.56
2	0.00 OP	42.33
2	0.00 OP	15.15
2	0.00 OP	55.89
2	0.00 OP	46.33
2	0.00 OP	60.57
2	0.00 OP	33.56
2	0.00 OP	32.36
2	0.00 OP	66.83
2	0.00 OP	45.1
2	0.00 OP	36.26
2	0.00 OP	25.52
2	0.00 OP	45.57
2	0.00 OP	67.14
2	0.00 OP	31.88
2	0.00 OP	41.83
2	0.00 OP	27.1
2	0.00 OP	25.31
2	0.00 OP	43.22
2	0.00 OP	56.94
2	0.00 OP	16.66
2	0.00 OP	92.1
2	0.00 OP	28.57
2	0.00 OP	36.04
2	0.00 OP	37.57
2	0.00 OP	25.95
2	0.00 OP	23.74
2	0.00 OP	9.86
2	0.00 OP	18.29
2	0.00 OP	47.6
2	0.00 OP	35.63
2	0.00 OP	34.63
2	0.00 OP	56.74
2	0.00 OP	37.1
2	0.00 OP	34.32
2	0.00 OP	42.88
2	0.00 OP	36.24
2	0.00 OP	57.42
2	0.00 OP	92.97
2	0.00 OP	29.5
2	0.00 OP	31.81
2	0.00 OP	49.5
2	0.00 OP	35.96
2	0.00 OP	32.73
2	0.00 OP	34.12
2	0.00 OP	21.41
2	0.00 OP	21.14
2	0.00 OP	42.52
2	0.00 OP	37.9
2	0.00 OP	30.83
2	0.00 OP	31.69
2	0.00 OP	24.31
2	0.00 OP	13.54
2	0.00 OP	61.88
2	0.00 OP	10.05
2	0.00 OP	43.12
3	0.05 CP	2.41
3	0.05 CP	30.01
3	0.05 CP	12.04
3	0.05 CP	17.89
3	0.05 CP	30.87
3	0.05 CP	25.11
3	0.05 CP	6.33
3	0.05 CP	39.7
3	0.05 CP	14.67
3	0.05 CP	37.25
3	0.05 CP	33.83
3	0.05 CP	22.51
3	0.05 CP	39.89
3	0.05 CP	41.7
3	0.05 CP	12.52
3	0.05 CP	25.91
3	0.05 CP	29.45
3	0.05 CP	29.68
3	0.05 CP	7.29
3	0.05 CP	21
3	0.05 CP	41.68
3	0.05 CP	30.91
3	0.05 CP	43.95
3	0.05 CP	32.47
3	0.05 CP	53.18
3	0.05 CP	17.63
3	0.05 CP	25.59
3	0.05 CP	19.31
3	0.05 CP	31.3
3	0.05 CP	9.1
3	0.05 CP	6.36
3	0.05 CP	25.99
3	0.05 CP	58.57
3	0.05 CP	22.15
3	0.05 CP	36.24
3	0.05 CP	5
3	0.05 CP	8.54
3	0.05 CP	47.6
3	0.05 CP	28.58
3	0.05 CP	50.68
3	0.05 CP	67.94
3	0.05 CP	33.46
3	0.05 CP	14.91
3	0.05 CP	47.76
3	0.05 CP	26.75
3	0.05 CP	28.63
3	0.05 CP	18.94
3	0.05 CP	45.39
3	0.05 CP	9.68
3	0.05 CP	20.77
3	0.05 CP	23.79
3	0.05 CP	32.14
3	0.05 CP	59.34
3	0.05 CP	23.61
3	0.05 CP	35.69
3	0.05 CP	4.61
3	0.05 CP	33.4
3	0.05 CP	31.65
3	0.05 CP	54.58
3	0.05 CP	12.85
3	0.05 CP	46.31
3	0.05 CP	41.93
3	0.05 CP	35.3
3	0.05 CP	18.32
3	0.05 CP	0.38
3	0.05 CP	10.22
3	0.05 CP	15.86
3	0.05 CP	13.97
3	0.05 CP	25.22
3	0.05 CP	33.36
3	0.05 CP	31.03
3	0.05 CP	7.28
3	0.05 CP	29.37
3	0.05 CP	10.87
3	0.05 CP	45.7
3	0.05 CP	42.41
3	0.05 CP	32.24
3	0.05 CP	10.36
3	0.05 CP	16.31
3	0.05 CP	36.32
3	0.05 CP	8.1
3	0.05 CP	40.41
3	0.05 CP	5.55
3	0.05 CP	34.78
3	0.05 CP	25.78
3	0.05 CP	17.16
3	0.05 CP	20.95
3	0.05 CP	22.15
3	0.05 CP	23.14
3	0.05 CP	3.27
3	0.05 CP	24.22
3	0.05 CP	36.58
3	0.05 CP	23.47
3	0.05 CP	25.78
3	0.05 CP	32.27
3	0.05 CP	54.89
3	0.05 CP	23.13
4	0.05 OP	6.72
4	0.05 OP	14.6
4	0.05 OP	7.75
4	0.05 OP	4.91
4	0.05 OP	52.19
4	0.05 OP	26.62
4	0.05 OP	18.28
4	0.05 OP	11.41
4	0.05 OP	19.29
4	0.05 OP	32.23
4	0.05 OP	17.09
4	0.05 OP	42.3
4	0.05 OP	45.96
4	0.05 OP	44.03
4	0.05 OP	10.53
4	0.05 OP	21.09
4	0.05 OP	13.23
4	0.05 OP	32.03
4	0.05 OP	9.49
4	0.05 OP	16.61
4	0.05 OP	9.01
4	0.05 OP	0.91
4	0.05 OP	10.81
4	0.05 OP	12.59
4	0.05 OP	8.3
4	0.05 OP	15.3
4	0.05 OP	3.96
4	0.05 OP	16.96
4	0.05 OP	7.31
4	0.05 OP	26.19
4	0.05 OP	2.28
4	0.05 OP	18.95
4	0.05 OP	25.23
4	0.05 OP	22.57
4	0.05 OP	0.86
4	0.05 OP	39.86
4	0.05 OP	38.24
4	0.05 OP	55.84
4	0.05 OP	37.28
4	0.05 OP	28.03
4	0.05 OP	29.26
4	0.05 OP	46.44
4	0.05 OP	20.98
4	0.05 OP	19.1
4	0.05 OP	35.8
4	0.05 OP	1.49
4	0.05 OP	18.29
4	0.05 OP	6.66
4	0.05 OP	51.3
4	0.05 OP	14.05
4	0.05 OP	6.5
4	0.05 OP	13.75
4	0.05 OP	26.73
4	0.05 OP	26.69
4	0.05 OP	5
4	0.05 OP	17.13
4	0.05 OP	33.76
4	0.05 OP	47.16
4	0.05 OP	22.54
4	0.05 OP	9.66
4	0.05 OP	33.09
4	0.05 OP	3.59
4	0.05 OP	3.55
4	0.05 OP	12.72
4	0.05 OP	15.67
4	0.05 OP	15.85
4	0.05 OP	41.61
4	0.05 OP	10.33
4	0.05 OP	43.11
4	0.05 OP	22.35
4	0.05 OP	5.74
4	0.05 OP	21.33
4	0.05 OP	27.05
4	0.05 OP	16.59
4	0.05 OP	12.81
4	0.05 OP	20.66
4	0.05 OP	14.66
4	0.05 OP	29.77
4	0.05 OP	10.24
4	0.05 OP	22.06
4	0.05 OP	7.4
4	0.05 OP	8.35
4	0.05 OP	8.43
4	0.05 OP	9.26
4	0.05 OP	28.61
4	0.05 OP	44.83
4	0.05 OP	45.53
4	0.05 OP	33.73
4	0.05 OP	19.03
4	0.05 OP	38.53
4	0.05 OP	1.8
4	0.05 OP	53.62
4	0.05 OP	18.06
4	0.05 OP	8.31
4	0.05 OP	31.39
4	0.05 OP	19.84
5	0.15 CP	0
5	0.15 CP	0
5	0.15 CP	0
5	0.15 CP	0
5	0.15 CP	0
5	0.15 CP	0.9
5	0.15 CP	1.22
5	0.15 CP	7.28
5	0.15 CP	12.78
5	0.15 CP	3.51
5	0.15 CP	15.46
5	0.15 CP	1.35
5	0.15 CP	4.66
5	0.15 CP	1.9
5	0.15 CP	3.73
5	0.15 CP	3.85
5	0.15 CP	3.99
5	0.15 CP	7.33
5	0.15 CP	2.25
5	0.15 CP	3.39
5	0.15 CP	0.6
5	0.15 CP	0.35
5	0.15 CP	28.5
5	0.15 CP	5.88
5	0.15 CP	4.17
5	0.15 CP	0.42
5	0.15 CP	27.55
5	0.15 CP	0.56
5	0.15 CP	0.03
5	0.15 CP	1.97
5	0.15 CP	2.78
5	0.15 CP	0.8
5	0.15 CP	22.8
5	0.15 CP	2.47
5	0.15 CP	2.84
5	0.15 CP	0.18
5	0.15 CP	0.09
5	0.15 CP	1.43
5	0.15 CP	8.65
5	0.15 CP	1.17
5	0.15 CP	0.48
5	0.15 CP	18.59
5	0.15 CP	5.61
5	0.15 CP	7.11
5	0.15 CP	17.54
5	0.15 CP	1.54
5	0.15 CP	1.63
5	0.15 CP	0.26
5	0.15 CP	2.4
5	0.15 CP	1.4
5	0.15 CP	0.73
5	0.15 CP	9.35
5	0.15 CP	0.34
5	0.15 CP	0.14
5	0.15 CP	0.4
5	0.15 CP	3.14
5	0.15 CP	8.67
5	0.15 CP	0.56
5	0.15 CP	3.48
5	0.15 CP	0.65
5	0.15 CP	6.18
5	0.15 CP	2.75
5	0.15 CP	0.16
5	0.15 CP	0.12
5	0.15 CP	0.05
5	0.15 CP	0.1
5	0.15 CP	1.73
5	0.15 CP	2.43
5	0.15 CP	0.31
5	0.15 CP	1.01
5	0.15 CP	3.25
5	0.15 CP	1.12
5	0.15 CP	11.65
5	0.15 CP	0.29
5	0.15 CP	2.68
5	0.15 CP	0.38
5	0.15 CP	0.03
5	0.15 CP	2.95
5	0.15 CP	1.29
5	0.15 CP	37.69
5	0.15 CP	0.55
5	0.15 CP	17.1
5	0.15 CP	0.2
5	0.15 CP	0.1
5	0.15 CP	2.47
5	0.15 CP	0.71
5	0.15 CP	0.67
5	0.15 CP	4.88
5	0.15 CP	6.01
5	0.15 CP	4.79
5	0.15 CP	0.4
5	0.15 CP	5.83
5	0.15 CP	0.27
5	0.15 CP	11.44
5	0.15 CP	0.75
5	0.15 CP	7.18
5	0.15 CP	1.01
5	0.15 CP	29.56
5	0.15 CP	0.08
6	0.15 OP	0.13
6	0.15 OP	25.33
6	0.15 OP	17.81
6	0.15 OP	1.64
6	0.15 OP	0.18
6	0.15 OP	0.93
6	0.15 OP	28.21
6	0.15 OP	2.05
6	0.15 OP	3.05
6	0.15 OP	0.93
6	0.15 OP	0
6	0.15 OP	0.6
6	0.15 OP	0.84
6	0.15 OP	39.77
6	0.15 OP	0.06
6	0.15 OP	4.72
6	0.15 OP	14.08
6	0.15 OP	4.16
6	0.15 OP	0.57
6	0.15 OP	1.27
6	0.15 OP	0.25
6	0.15 OP	3.1
6	0.15 OP	1.11
6	0.15 OP	8.32
6	0.15 OP	0.85
6	0.15 OP	0.35
6	0.15 OP	1.12
6	0.15 OP	3.1
6	0.15 OP	4.91
6	0.15 OP	0.12
6	0.15 OP	0.49
6	0.15 OP	0.16
6	0.15 OP	0.32
6	0.15 OP	0.46
6	0.15 OP	0.33
6	0.15 OP	0.07
6	0.15 OP	0.6
6	0.15 OP	0.47
6	0.15 OP	0.04
6	0.15 OP	0.22
6	0.15 OP	0.36
6	0.15 OP	0
6	0.15 OP	0.18
6	0.15 OP	0.09
6	0.15 OP	0
6	0.15 OP	1.84
6	0.15 OP	7.09
6	0.15 OP	0.55
6	0.15 OP	0.73
6	0.15 OP	0.25
6	0.15 OP	24.24
6	0.15 OP	4.51
6	0.15 OP	1.18
6	0.15 OP	0.5
6	0.15 OP	38.03
6	0.15 OP	17.2
6	0.15 OP	1.49
6	0.15 OP	0.19
6	0.15 OP	1.97
6	0.15 OP	2.43
6	0.15 OP	8.05
6	0.15 OP	5.2
6	0.15 OP	23.16
6	0.15 OP	1.16
6	0.15 OP	0.05
6	0.15 OP	15.03
6	0.15 OP	0.72
6	0.15 OP	1.8
6	0.15 OP	0.13
6	0.15 OP	1.45
6	0.15 OP	0.9
6	0.15 OP	0.38
6	0.15 OP	1.88
6	0.15 OP	0.71
6	0.15 OP	0.98
6	0.15 OP	0.29
6	0.15 OP	0.23
6	0.15 OP	0.16
6	0.15 OP	0.06
6	0.15 OP	43
6	0.15 OP	4.59
6	0.15 OP	0.12
6	0.15 OP	2.08
6	0.15 OP	7.36
6	0.15 OP	0.42
6	0.15 OP	0.09
6	0.15 OP	0.41
6	0.15 OP	0.2
6	0.15 OP	0.05
7	0.25 CP	0
7	0.25 CP	0
7	0.25 CP	0
7	0.25 CP	0
7	0.25 CP	0
7	0.25 CP	0
7	0.25 CP	0
7	0.25 CP	0
7	0.25 CP	0
7	0.25 CP	0
7	0.25 CP	0
7	0.25 CP	0
7	0.25 CP	0
7	0.25 CP	0
7	0.25 CP	0
7	0.25 CP	0
7	0.25 CP	0
7	0.25 CP	0
7	0.25 CP	0
7	0.25 CP	0
7	0.25 CP	0
7	0.25 CP	0
7	0.25 CP	0
7	0.25 CP	0
7	0.25 CP	0
7	0.25 CP	0
7	0.25 CP	0
7	0.25 CP	0
7	0.25 CP	0
7	0.25 CP	0
7	0.25 CP	0
7	0.25 CP	0.03
7	0.25 CP	0.95
7	0.25 CP	0.18
7	0.25 CP	0.75
7	0.25 CP	0.24
7	0.25 CP	0.19
7	0.25 CP	1.17
7	0.25 CP	5.09
7	0.25 CP	10.43
7	0.25 CP	0.29
7	0.25 CP	1.89
7	0.25 CP	2.27
7	0.25 CP	0.13
7	0.25 CP	0.23
7	0.25 CP	5.55
7	0.25 CP	3.53
7	0.25 CP	5.38
7	0.25 CP	1.78
7	0.25 CP	1.1
7	0.25 CP	0.15
7	0.25 CP	0.03
7	0.25 CP	0.24
7	0.25 CP	0.06
7	0.25 CP	0.03
7	0.25 CP	0.6
7	0.25 CP	0.07
7	0.25 CP	0.63
7	0.25 CP	3.08
7	0.25 CP	0.53
7	0.25 CP	0.45
7	0.25 CP	0.03
7	0.25 CP	0.03
7	0.25 CP	5.49
7	0.25 CP	0.16
7	0.25 CP	7.04
7	0.25 CP	0.03
7	0.25 CP	2.06
7	0.25 CP	0.03
7	0.25 CP	22.3
7	0.25 CP	2.77
7	0.25 CP	2.84
7	0.25 CP	2.93
7	0.25 CP	0.06
7	0.25 CP	0.1
7	0.25 CP	0.26
7	0.25 CP	0.74
7	0.25 CP	0.15
7	0.25 CP	0.45
7	0.25 CP	0.67
7	0.25 CP	2.1
7	0.25 CP	0.29
7	0.25 CP	7.02
7	0.25 CP	2.34
7	0.25 CP	2.06
7	0.25 CP	1.29
7	0.25 CP	1.27
7	0.25 CP	8.72
7	0.25 CP	1.88
7	0.25 CP	3.46
7	0.25 CP	10.86
7	0.25 CP	0.03
7	0.25 CP	4.12
7	0.25 CP	0.08
7	0.25 CP	0.08
7	0.25 CP	0.32
8	0.25 OP	0.13
8	0.25 OP	0.14
8	0.25 OP	12.64
8	0.25 OP	0
8	0.25 OP	0
8	0.25 OP	0.14
8	0.25 OP	0
8	0.25 OP	2.8
8	0.25 OP	0.33
8	0.25 OP	0.31
8	0.25 OP	2.45
8	0.25 OP	0
8	0.25 OP	0
8	0.25 OP	0
8	0.25 OP	0.38
8	0.25 OP	0
8	0.25 OP	1.01
8	0.25 OP	0
8	0.25 OP	11.84
8	0.25 OP	1.66
8	0.25 OP	4.34
8	0.25 OP	0
8	0.25 OP	0.48
8	0.25 OP	1.01
8	0.25 OP	0
8	0.25 OP	0.74
8	0.25 OP	0
8	0.25 OP	1.18
8	0.25 OP	0
8	0.25 OP	0.16
8	0.25 OP	0.61
8	0.25 OP	0
8	0.25 OP	0.01
8	0.25 OP	0
8	0.25 OP	0.06
8	0.25 OP	0
8	0.25 OP	0
8	0.25 OP	0
8	0.25 OP	2.29
8	0.25 OP	1.52
8	0.25 OP	0
8	0.25 OP	9.12
8	0.25 OP	0.99
8	0.25 OP	1.84
8	0.25 OP	2.04
8	0.25 OP	0.02
8	0.25 OP	0
8	0.25 OP	0
8	0.25 OP	0.4
8	0.25 OP	0
8	0.25 OP	0
8	0.25 OP	2.42
8	0.25 OP	0.12
8	0.25 OP	0.19
8	0.25 OP	0
8	0.25 OP	8.91
8	0.25 OP	0.17
8	0.25 OP	0
8	0.25 OP	0
8	0.25 OP	0.02
8	0.25 OP	0.03
8	0.25 OP	0.17
8	0.25 OP	0
8	0.25 OP	0
8	0.25 OP	0
8	0.25 OP	0
8	0.25 OP	0
8	0.25 OP	1.21
8	0.25 OP	0
8	0.25 OP	0.08
8	0.25 OP	0
8	0.25 OP	0
8	0.25 OP	0.08
8	0.25 OP	1.2
8	0.25 OP	2.01
8	0.25 OP	0.02
8	0.25 OP	0
8	0.25 OP	0.3
8	0.25 OP	0.02
8	0.25 OP	0.24
8	0.25 OP	0
8	0.25 OP	0.15
8	0.25 OP	0.16
8	0.25 OP	0.06
8	0.25 OP	0.03
8	0.25 OP	0.07
8	0.25 OP	0.89
8	0.25 OP	1.38
8	0.25 OP	1.73
8	0.25 OP	2.25
8	0.25 OP	0.07
8	0.25 OP	2.37
8	0.25 OP	0.34
8	0.25 OP	3.39
8	0.25 OP	3.77
8	0.25 OP	0.58
8	0.25 OP	2.49
8	0.25 OP	0.26

## Sheet: Figure2b_data_and_stats
EMS treatment	Head #	Bagging date	Est. Seedset (%)
0	1	9/4	80
0	2	9/4	95
0	3	9/4	100
0	4	9/4	100
0	5	9/4	95																ANOVA
0	6	9/4	95																Est. Seedset (%)
0	7	9/4	100																	Sum of Squares	df	Mean Square	F	Sig.
0	8	9/4	100																Between Groups	457523	3	152508	340.912	2.50041e-109
0	9	9/4	100																Within Groups	177151	396	447.351
0	10	9/4	100																Total	634674	399
0	11	9/4	100
0	12	9/4	100
0	13	9/4	95
0	14	9/4	100
0	15	9/4	100
0	16	9/4	95
0	17	9/4	80
0	18	9/4	100
0	19	9/4	100
0	20	9/4	100
0	21	9/4	100
0	22	9/4	100
0	23	9/4	100
0	24	8/4	90
0	25	8/4	95
0	26	8/4	90
0	27	8/4	95		Multiple Comparisons
0	28	10/4	100		Dependent Variable:	Est. Seedset (%)
0	29	8/4	95		(I) EMS treatment			Mean Difference (I-J)	Std. Error	Sig.	95% Confidence Interval
0	30	8/4	95								Lower Bound	Upper Bound
0	31	8/4	80		LSD	.00	.05	6.95000*	2.99116	0.0206571	1.06946	12.8305
0	32	8/4	95				.15	57.21000*	2.99116	3.14807e-58	51.3295	63.0905
0	33	8/4	90				.25	80.56000*	2.99116	1.54924e-91	74.6795	86.4405
0	34	8/4	95			.05	.00	-6.95000*	2.99116	0.0206571	-12.8305	-1.06946
0	35	8/4	100				.15	50.26000*	2.99116	3.2301e-48	44.3795	56.1405
0	36	8/4	95				.25	73.61000*	2.99116	8.25022e-82	67.7295	79.4905
0	37	8/4	95			.15	.00	-57.21000*	2.99116	3.14807e-58	-63.0905	-51.3295
0	38	8/4	85				.05	-50.26000*	2.99116	3.2301e-48	-56.1405	-44.3795
0	39	8/4	95				.25	23.35000*	2.99116	5.31135e-14	17.4695	29.2305
0	40	8/4	95			.25	.00	-80.56000*	2.99116	1.54924e-91	-86.4405	-74.6795
0	41	8/4	95				.05	-73.61000*	2.99116	8.25022e-82	-79.4905	-67.7295
0	42	8/4	95				.15	-23.35000*	2.99116	5.31135e-14	-29.2305	-17.4695
0	43	8/4	75		*. The mean difference is significant at the 0.05 level.
0	44	8/4	95
0	45	8/4	90		Est. Seedset (%)
0	46	10/4	100		EMS treatment		N	Subset for alpha = 0.05
0	47	8/4	95					1	2	3	4
0	48	8/4	90		Student-Newman-Keulsa	.25	100	13.24
0	49	8/4	95			.15	100		36.59
0	50	8/4	95			.05	100			86.85
0	51	8/4	95			.00	100				93.8
0	52	8/4	100			Sig.		1	1	1	1
0	53	8/4	95		Waller-Duncana,b	.25	100	13.24
0	54	8/4	100			.15	100		36.59
0	55	8/4	95			.05	100			86.85
0	56	8/4	100			.00	100				93.8
0	57	8/4	95		Means for groups in homogeneous subsets are displayed.
0	58	8/4	90		a. Uses Harmonic Mean Sample Size = 100.000.
0	59	10/4	95		b. Type 1/Type 2 Error Seriousness Ratio = 100.
0	60	8/4	90
0	61	8/4	95
0	62	10/4	95
0	63	8/4	90
0	64	10/4	95
0	65	8/4	95				EMS Treatment	No of Heads without seed set			EMS Treatment	No. of Heads with Seed <10%
0	66	8/4	90				Control	0			Control	0
0	67	8/4	95				0.05	0			0.05	1
0	68	8/4	95				0.15	11			0.15	43
0	69	8/4	100				0.25	40			0.25	70
0	70	8/4	90
0	71	8/4	80
0	72	10/4	95
0	73	8/4	85
0	74	8/4	90
0	75	8/4	90
0	76	8/4	80
0	77	8/4	95
0	78	8/4	95
0	79	8/4	75
0	80	8/4	90
0	81	8/4	95
0	82	10/4	95
0	83	8/4	90
0	84	8/4	85
0	85	8/4	100
0	86	8/4	90
0	87	8/4	100
0	88	8/4	100
0	89	8/4	90
0	90	8/4	100
0	91	8/4	100
0	92	8/4	90
0	93	8/4	90
0	94	10/4	60
0	95	8/4	100
0	96	8/4	100
0	97	10/4	100
0	98	8/4	100
0	99	8/4	100
0	100	8/4	80
0.05	1	8/4	60
0.05	2	8/4	95
0.05	3	8/4	100
0.05	4	5/4	90
0.05	5	5/4	100
0.05	6	8/4	90
0.05	7	29/3	95
0.05	8	29/3	100
0.05	9	5/4	75
0.05	10	5/4	95
0.05	11	8/4	75
0.05	12	29/3	95
0.05	13	5/4	90
0.05	14	8/4	90
0.05	15	30/3	100
0.05	16	8/4	95
0.05	17	8/4	90
0.05	18	8/4	90
0.05	19	8/4	95
0.05	20	5/4	95
0.05	21	29/3	100
0.05	22	10/4	95
0.05	23	8/4	60
0.05	24	30/3	95
0.05	25	5/4	90
0.05	26	8/4	100
0.05	27	5/4	70
0.05	28	2/4	95
0.05	29	5/4	80
0.05	30	30/3	95
0.05	31	29/3	95
0.05	32	30/3	90
0.05	33	29/3	95
0.05	34	8/4	100
0.05	35	9/4	95
0.05	36	5/4	100
0.05	37	8/4	100
0.05	38	5/4	95
0.05	39	8/4	80
0.05	40	5/4	75
0.05	41	5/4	80
0.05	42	5/4	95
0.05	43	8/4	90
0.05	44	8/4	75
0.05	45	5/4	90
0.05	46	30/3	90
0.05	47	8/4	75
0.05	48	5/4	90
0.05	49	5/4	75
0.05	50	5/4	90
0.05	51	8/4	80
0.05	52	5/4	75
0.05	53	10/4	95
0.05	54	30/3	95
0.05	55	29/3	100
0.05	56	5/4	90
0.05	57	8/4	90
0.05	58	30/3	60
0.05	59	8/4	50
0.05	60	8/4	100
0.05	61	5/4	100
0.05	62	5/4	100
0.05	63	29/3	95
0.05	64	30/3	90
0.05	65	30/3	80
0.05	66	5/4	85
0.05	67	8/4	95
0.05	68	5/4	80
0.05	69	30/3	100
0.05	70	10/4	5
0.05	71	29/3	90
0.05	72	29/3	90
0.05	73	10/4	20
0.05	74	29/3	100
0.05	75	29/3	90
0.05	76	8/4	100
0.05	77	29/3	90
0.05	78	8/4	90
0.05	79	29/3	90
0.05	80	29/3	100
0.05	81	29/3	90
0.05	82	29/3	80
0.05	83	29/3	90
0.05	84	8/4	80
0.05	85	29/3	90
0.05	86	29/3	90
0.05	87	10/4	60
0.05	88	29/3	90
0.05	89	29/3	80
0.05	90	29/3	80
0.05	91	8/4	80
0.05	92	29/3	80
0.05	93	8/4	70
0.05	94	29/3	90
0.05	95	29/3	90
0.05	96	29/3	90
0.05	97	5/4	90
0.05	98	29/3	90
0.05	99	29/3	90
0.05	100	29/3	90
0.15	1	10/4	2
0.15	2	8/4	5
0.15	3	5/4	50
0.15	4	8/4	5
0.15	5	8/4	0
0.15	6	8/4	10
0.15	7	8/4	60
0.15	8	10/4	70
0.15	9	5/4	30
0.15	10	5/4	85
0.15	11	8/4	0
0.15	12	5/4	5
0.15	13	5/4	20
0.15	14	8/4	10
0.15	15	8/4	5
0.15	16	8/4	0
0.15	17	29/3	85
0.15	18	29/3	90
0.15	19	10/4	0
0.15	20	8/4	5
0.15	21	8/4	75
0.15	22	8/4	0
0.15	23	10/4	5
0.15	24	8/4	5
0.15	25	8/4	40
0.15	26	8/4	40
0.15	27	8/4	10
0.15	28	8/4	10
0.15	29	8/4	2
0.15	30	8/4	0
0.15	31	8/4	40
0.15	32	8/4	70
0.15	33	10/4	5
0.15	34	8/4	80
0.15	35	8/4	60
0.15	36	8/4	10
0.15	37	8/4	80
0.15	38	8/4	80
0.15	39	8/4	90
0.15	40	8/4	80
0.15	41	29/3	95
0.15	42	8/4	0
0.15	43	8/4	5
0.15	44	29/3	40
0.15	45	8/4	50
0.15	46	8/4	90
0.15	47	8/4	85
0.15	48	8/4	10
0.15	49	30/3	80
0.15	50	10/4	5
0.15	51	8/4	85
0.15	52	8/4	2
0.15	53	8/4	40
0.15	54	8/4	0
0.15	55	8/4	60
0.15	56	10/4	30
0.15	57	8/4	10
0.15	58	10/4	40
0.15	59	8/4	90
0.15	60	8/4	80
0.15	61	8/4	95
0.15	62	8/4	30
0.15	63	29/3	20
0.15	64	29/3	40
0.15	65	8/4	80
0.15	66	29/3	60
0.15	67	8/4	0
0.15	68	8/4	40
0.15	69	29/3	50
0.15	70	29/3	90
0.15	71	8/4	50
0.15	72	8/4	10
0.15	73	8/4	5
0.15	74	8/4	1
0.15	75	29/3	5
0.15	76	29/3	40
0.15	77	8/4	0
0.15	78	30/3	25
0.15	79	8/4	20
0.15	80	29/3	20
0.15	81	8/4	70
0.15	82	8/4	70
0.15	83	29/3	70
0.15	84	29/3	5
0.15	85	29/3	50
0.15	86	29/3	10
0.15	87	8/4	70
0.15	88	29/3	70
0.15	89	29/3	50
0.15	90	29/3	10
0.15	91	29/3	10
0.15	92	8/4	2
0.15	93	29/3	30
0.15	94	29/3	20
0.15	95	8/4	0
0.15	96	30/3	60
0.15	97	29/3	70
0.15	98	8/4	25
0.15	99	8/4	10
0.15	100	29/3	60
0.25	1	5/4	0
0.25	2	30/3	2
0.25	3	8/4	0
0.25	4	5/4	2
0.25	5	8/4	0
0.25	6	5/4	60
0.25	7	8/4	0
0.25	8	5/4	20
0.25	9	8/4	0
0.25	10	5/4	5
0.25	11	5/4	0
0.25	12	5/4	5
0.25	13	5/4	5
0.25	14	30/3	20
0.25	15	5/4	60
0.25	16	5/4	2
0.25	17	8/4	2
0.25	18	8/4	20
0.25	19	5/4	0
0.25	20	8/4	5
0.25	21	5/4	20
0.25	22	30/3	10
0.25	23	30/3	10
0.25	24	5/4	0
0.25	25	5/4	30
0.25	26	5/4	0
0.25	27	8/4	2
0.25	28	5/4	30
0.25	29	5/4	30
0.25	30	8/4	10
0.25	31	5/4	30
0.25	32	5/4	0
0.25	33	5/4	80
0.25	34	5/4	60
0.25	35	8/4	0
0.25	36	5/4	80
0.25	37	8/4	0
0.25	38	5/4	15
0.25	39	5/4	30
0.25	40	8/4	0
0.25	41	5/4	2
0.25	42	5/4	0
0.25	43	5/4	70
0.25	44	8/4	40
0.25	45	8/4	0
0.25	46	5/4	2
0.25	47	5/4	0
0.25	48	5/4	40
0.25	49	8/4	5
0.25	50	5/4	0
0.25	51	5/4	10
0.25	52	8/4	40
0.25	53	8/4	0
0.25	54	8/4	0
0.25	55	5/4	0
0.25	56	8/4	30
0.25	57	8/4	5
0.25	58	8/4	20
0.25	59	8/4	0
0.25	60	8/4	0
0.25	61	8/4	90
0.25	62	5/4	90
0.25	63	5/4	5
0.25	64	5/4	20
0.25	65	8/4	5
0.25	66	8/4	0
0.25	67	5/4	10
0.25	68	30/3	10
0.25	69	8/4	0
0.25	70	8/4	5
0.25	71	30/3	0
0.25	72	8/4	0
0.25	73	5/4	15
0.25	74	5/4	0
0.25	75	30/3	10
0.25	76	5/4	0
0.25	77	8/4	1
0.25	78	5/4	0
0.25	79	8/4	1
0.25	80	8/4	5
0.25	81	30/3	0
0.25	82	30/3	25
0.25	83	5/4	1
0.25	84	8/4	0
0.25	85	30/3	5
0.25	86	5/4	5
0.25	87	8/4	0
0.25	88	30/3	0
0.25	89	8/4	0
0.25	90	30/3	0
0.25	91	30/3	0
0.25	92	5/4	1
0.25	93	5/4	15
0.25	94	30/3	70
0.25	95	5/4	0
0.25	96	30/3	0
0.25	97	30/3	25
0.25	98	8/4	1
0.25	99	5/4	0
0.25	100	5/4	0

## Sheet: Figure2c_data_and_stats
Treatment	Observation Day	Germination %	Germ %
0	4	0.98	98
0	4	0.93	93
0	4	0.99	99
0	4	0.93	93
0	4	0.98	98
0	4	0.89	89
0	4	0.61	61
0	4	0.93	93
0	4	0.92	92
0	4	0.94	94
0.05	4	0.84	84
0.05	4	0.91	91
0.05	4	0.8	80
0.05	4	0.9	90
0.05	4	0.77	77
0.15	4	0.78	78
0.15	4	0.7	70
0.15	4	0.75	75
0.15	4	0.77	77
0.15	4	0.79	79
0.15	4	0.63	63
0.15	4	0.62	62
0.15	4	0.69	69
0.15	4	0.65	65
0.15	4	0.7	70
0.25	4	0.79	79
0.25	4	0.81	81
0.25	4	0.57	57
0.25	4	0.65	65
0.25	4	0.61	61
0	10	0.99	99
0	10	0.99	99
0	10	1	100
0	10	0.94	94
0	10	0.99	99
0	10	0.96	96
0	10	0.61	61
0	10	0.96	96
0	10	0.94	94
0	10	1	100
0.05	10	0.88	88
0.05	10	0.9	90
0.05	10	0.87	87
0.05	10	0.91	91
0.05	10	0.79	79
0.15	10	0.89	89
0.15	10	0.87	87
0.15	10	0.91	91
0.15	10	0.91	91
0.15	10	0.8	80
0.15	10	0.77	77
0.15	10	0.86	86
0.15	10	0.84	84
0.15	10	0.71	71
0.15	10	0.81	81
0.25	10	0.81	81
0.25	10	0.81	81
0.25	10	0.65	65
0.25	10	0.72	72
0.25	10	0.66	66

## Sheet: Figure3b_data_and_stats
EMS treatment	Mutant type	Variants	Variant Type no.	Treatment Type No.
0.05	Synonymous	24	1	1				Synonymous
0.05	Synonymous	13	1	1
0.05	Synonymous	9	1	1
0.05	Synonymous	14	1	1
0.05	Synonymous	30	1	1
0.15	Synonymous	119	1	2
0.15	Synonymous	99	1	2
0.15	Synonymous	49	1	2
0.15	Synonymous	31	1	2
0.15	Synonymous	57	1	2
0.15	Synonymous	66	1	2
0.15	Synonymous	127	1	2
0.15	Synonymous	65	1	2
0.15	Synonymous	59	1	2
0.15	Synonymous	94	1	2
0.25	Synonymous	149	1	3
0.25	Synonymous	31	1	3
0.25	Synonymous	67	1	3
0.25	Synonymous	89	1	3
0.25	Synonymous	129	1	3
0.05	Premature Stop Codon	3	3	1
0.05	Premature Stop Codon	1	3	1
0.05	Premature Stop Codon	2	3	1
0.05	Premature Stop Codon	3	3	1
0.05	Premature Stop Codon	4	3	1
0.15	Premature Stop Codon	10	3	2
0.15	Premature Stop Codon	5	3	2
0.15	Premature Stop Codon	10	3	2
0.15	Premature Stop Codon	10	3	2
0.15	Premature Stop Codon	10	3	2			Premature Stop Codon
0.15	Premature Stop Codon	16	3	2
0.15	Premature Stop Codon	26	3	2
0.15	Premature Stop Codon	10	3	2
0.15	Premature Stop Codon	9	3	2
0.15	Premature Stop Codon	13	3	2
0.25	Premature Stop Codon	20	3	3
0.25	Premature Stop Codon	3	3	3
0.25	Premature Stop Codon	7	3	3
0.25	Premature Stop Codon	13	3	3
0.25	Premature Stop Codon	17	3	3
0.05	Missense	50	2	1
0.05	Missense	9	2	1
0.05	Missense	13	2	1
0.05	Missense	24	2	1
0.05	Missense	52	2	1
0.15	Missense	166	2	2
0.15	Missense	167	2	2
0.15	Missense	97	2	2
0.15	Missense	54	2	2
0.15	Missense	98	2	2
0.15	Missense	125	2	2
0.15	Missense	244	2	2
0.15	Missense	115	2	2
0.15	Missense	127	2	2
0.15	Missense	140	2	2
0.25	Missense	234	2	3
0.25	Missense	61	2	3
0.25	Missense	98	2	3
0.25	Missense	162	2	3
0.25	Missense	242	2	3
							Missense

## Sheet: Figure_3a_data_and_stats
EMS treatment	Genomic Region	No. of EMS Type Mutations	Replicate	Sample Number	Treatment No. ID	Region ID No.
0.05	Whole genome	3192	1	11	1	1
0.05	Whole genome	1766	2	12	1	1
0.05	Whole genome	1739	3	13	1	1																		WHOLE GENOME							INTERGENIC REGION
0.05	Whole genome	1763	4	14	1	1
0.05	Whole genome	3044	5	15	1	1
0.15	Whole genome	5672	1	16	2	1
0.15	Whole genome	5019	2	17	2	1
0.15	Whole genome	5099	3	18	2	1
0.15	Whole genome	3093	4	19	2	1
0.15	Whole genome	5677	5	20	2	1
0.15	Whole genome	6927	6	31	2	1
0.15	Whole genome	11097	7	32	2	1
0.15	Whole genome	5577	8	33	2	1
0.15	Whole genome	6517	9	34	2	1
0.15	Whole genome	7204	10	35	2	1
0.25	Whole genome	11317	1	26	3	1
0.25	Whole genome	4203	2	27	3	1
0.25	Whole genome	5752	3	28	3	1
0.25	Whole genome	7379	4	29	3	1
0.25	Whole genome	10485	5	30	3	1
0.05	Intergenic Region	2905	1	11	1	4
0.05	Intergenic Region	1644	2	12	1	4
0.05	Intergenic Region	1645	3	13	1	4
0.05	Intergenic Region	1600	4	14	1	4
0.05	Intergenic Region	2781	5	15	1	4
0.15	Intergenic Region	5013	1	16	2	4
0.15	Intergenic Region	4383	2	17	2	4
0.15	Intergenic Region	4563	3	18	2	4
0.15	Intergenic Region	2752	4	19	2	4
0.15	Intergenic Region	5108	5	20	2	4
0.15	Intergenic Region	6205	6	31	2	4																		GENE REGION
0.15	Intergenic Region	9797	7	32	2	4																									CDR REGION
0.15	Intergenic Region	4987	8	33	2	4
0.15	Intergenic Region	5813	9	34	2	4
0.15	Intergenic Region	6392	10	35	2	4
0.25	Intergenic Region	10000	1	26	3	4
0.25	Intergenic Region	3822	2	27	3	4
0.25	Intergenic Region	4554	3	28	3	4
0.25	Intergenic Region	6533	4	29	3	4
0.25	Intergenic Region	9293	5	30	3	4
0.05	Genic Region	287	1	11	1	3
0.05	Genic Region	122	2	12	1	3
0.05	Genic Region	94	3	13	1	3
0.05	Genic Region	163	4	14	1	3
0.05	Genic Region	263	5	15	1	3
0.15	Genic Region	659	1	16	2	3
0.15	Genic Region	636	2	17	2	3
0.15	Genic Region	536	3	18	2	3
0.15	Genic Region	341	4	19	2	3
0.15	Genic Region	569	5	20	2	3
0.15	Genic Region	722	6	31	2	3
0.15	Genic Region	1300	7	32	2	3
0.15	Genic Region	590	8	33	2	3
0.15	Genic Region	704	9	34	2	3
0.15	Genic Region	812	10	35	2	3
0.25	Genic Region	1317	1	26	3	3
0.25	Genic Region	381	2	27	3	3
0.25	Genic Region	1198	3	28	3	3
0.25	Genic Region	846	4	29	3	3
0.25	Genic Region	1192	5	30	3	3
0.05	CDR	77	1	11	1	2
0.05	CDR	24	2	12	1	2
0.05	CDR	25	3	13	1	2
0.05	CDR	45	4	14	1	2
0.05	CDR	88	5	15	1	2
0.15	CDR	306	1	16	2	2
0.15	CDR	278	2	17	2	2
0.15	CDR	158	3	18	2	2
0.15	CDR	95	4	19	2	2
0.15	CDR	165	5	20	2	2
0.15	CDR	205	6	31	2	2
0.15	CDR	412	7	32	2	2
0.15	CDR	190	8	33	2	2
0.15	CDR	201	9	34	2	2
0.15	CDR	252	10	35	2	2
0.25	CDR	410	1	26	3	2
0.25	CDR	106	2	27	3	2
0.25	CDR	182	3	28	3	2
0.25	CDR	272	4	29	3	2
0.25	CDR	400	5	30	3	2

## Sheet: Figure_4_EMS_Type_Mutations
EMS treatment	No of EMS Type Mutations
0	0
0	0
0	0
0	0
0	0
0	0
0	0
0.05	77
0.05	24
0.05	25
0.05	45
0.05	88
0.15	306
0.15	278
0.15	158
0.15	95
0.15	165
0.15	205
0.15	412
0.15	190
0.15	201
0.15	252
0.25	410
0.25	106
0.25	182
0.25	272		Quadratic/polynomial chosen as the most representative line based on R2 value and visual assessment, as it is
0.25	400		unlikely that the number of EMS type mutations will go down, making the cubic line of best fit a poor representation, even though the R2 value is slightly higher.
			Additional other plateau like functions i.e. Michaelis-Menten , will likely not work due to low number of X axis points not anchoring the curve, leading to overfitting

## Sheet: Figure_4_Av_Seed_Yield
EMS Treatment	Genomic Region	Average Seed yield per panicle	No. of EMS type Mutations
0	Whole Genome	50.41	0
0	Whole Genome	19.85	0
0	Whole Genome	42.14	0
0	Whole Genome	17.84	0
0	Whole Genome	19.39	0
0	Whole Genome	39.69	0
0	Whole Genome	52.22	0
0	Whole Genome	18.31	0
0	Whole Genome	43.58	0
0	Whole Genome	44.18	0
0	Whole Genome	13.29	0
0	Whole Genome	20.34	0
0	Whole Genome	16.96	0
0	Whole Genome	34.09	0
0	Whole Genome	22.09	0
0	Whole Genome	13.33	0
0	Whole Genome	9.79	0
0	Whole Genome	13.78	0
0	Whole Genome	29.57	0
0	Whole Genome	22.97	0
0	Whole Genome	13.77	0		Quadratic/polynomial chosen as the most representative line based on R2 value and visual assessment, as it is
0	Whole Genome	16.92	0		unlikely that the seed yield will go up between 0.00 and 0.05, making the cubic line of best fit a poor representation, even though the R2 value is slightly higher.
0	Whole Genome	18.47	0		Additional other plateau like functions i.e. Michaelis-Menten , will likely not work due to low number of X axis points not anchoring the curve, leading to overfitting
0	Whole Genome	51.62	0
0	Whole Genome	13.72	0
0	Whole Genome	34.58	0
0	Whole Genome	25.99	0
0	Whole Genome	26.63	0
0	Whole Genome	15.57	0
0	Whole Genome	14.4	0
0	Whole Genome	18.8	0
0	Whole Genome	62.98	0
0	Whole Genome	32.25	0
0	Whole Genome	35.03	0
0	Whole Genome	25.3	0
0	Whole Genome	52.38	0
0	Whole Genome	20.39	0
0	Whole Genome	9.73	0
0	Whole Genome	16.65	0
0	Whole Genome	25.36	0
0	Whole Genome	28.13	0
0	Whole Genome	61.4	0
0	Whole Genome	31.04	0
0	Whole Genome	15.74	0
0	Whole Genome	46.17	0
0	Whole Genome	15.44	0
0	Whole Genome	29.17	0
0	Whole Genome	35.49	0
0	Whole Genome	17.92	0
0	Whole Genome	17.5	0
0	Whole Genome	21.11	0
0	Whole Genome	21.91	0
0	Whole Genome	19.38	0
0	Whole Genome	17.42	0
0	Whole Genome	42.44	0
0	Whole Genome	42.28	0
0	Whole Genome	42.09	0
0	Whole Genome	59.24	0
0	Whole Genome	43.93	0
0	Whole Genome	47.12	0
0	Whole Genome	62.28	0
0	Whole Genome	12.51	0
0	Whole Genome	34.26	0
0	Whole Genome	20.11	0
0	Whole Genome	26.93	0
0	Whole Genome	19.37	0
0	Whole Genome	54.05	0
0	Whole Genome	24.99	0
0	Whole Genome	27.48	0
0	Whole Genome	47.91	0
0	Whole Genome	57.87	0
0	Whole Genome	58.71	0
0	Whole Genome	38.45	0
0	Whole Genome	22.24	0
0	Whole Genome	46.1	0
0	Whole Genome	35.14	0
0	Whole Genome	37.39	0
0	Whole Genome	33.48	0
0	Whole Genome	27.1	0
0	Whole Genome	48.25	0
0	Whole Genome	29.56	0
0	Whole Genome	23.01	0
0	Whole Genome	28.45	0
0	Whole Genome	41.21	0
0	Whole Genome	21.03	0
0	Whole Genome	33.13	0
0	Whole Genome	38.5	0
0	Whole Genome	63.43	0
0	Whole Genome	17.5	0
0	Whole Genome	29.81	0
0	Whole Genome	66.83	0
0	Whole Genome	24.55	0
0	Whole Genome	26.32	0
0	Whole Genome	10.83	0
0	Whole Genome	52.63	0
0	Whole Genome	42.87	0
0	Whole Genome	42.87	0
0	Whole Genome	22.96	0
0	Whole Genome	25.34	0
0.05	Whole Genome	2.41	3192
0.05	Whole Genome	30.01	1766
0.05	Whole Genome	12.04	1739
0.05	Whole Genome	17.89	1763
0.05	Whole Genome	30.87	3044
0.05	Whole Genome	25.11
0.05	Whole Genome	6.33
0.05	Whole Genome	39.7
0.05	Whole Genome	14.67
0.05	Whole Genome	37.25
0.05	Whole Genome	33.83
0.05	Whole Genome	22.51
0.05	Whole Genome	39.89
0.05	Whole Genome	41.7
0.05	Whole Genome	12.52
0.05	Whole Genome	25.91
0.05	Whole Genome	29.45
0.05	Whole Genome	29.68
0.05	Whole Genome	7.29
0.05	Whole Genome	21
0.05	Whole Genome	41.68
0.05	Whole Genome	30.91
0.05	Whole Genome	43.95
0.05	Whole Genome	32.47
0.05	Whole Genome	53.18
0.05	Whole Genome	17.63
0.05	Whole Genome	25.59
0.05	Whole Genome	19.31
0.05	Whole Genome	31.3
0.05	Whole Genome	9.1
0.05	Whole Genome	6.36
0.05	Whole Genome	25.99
0.05	Whole Genome	58.57
0.05	Whole Genome	22.15
0.05	Whole Genome	36.24
0.05	Whole Genome	5
0.05	Whole Genome	8.54
0.05	Whole Genome	47.6
0.05	Whole Genome	28.58
0.05	Whole Genome	50.68
0.05	Whole Genome	67.94
0.05	Whole Genome	33.46
0.05	Whole Genome	14.91
0.05	Whole Genome	47.76
0.05	Whole Genome	26.75
0.05	Whole Genome	28.63
0.05	Whole Genome	18.94
0.05	Whole Genome	45.39
0.05	Whole Genome	9.68
0.05	Whole Genome	20.77
0.05	Whole Genome	23.79
0.05	Whole Genome	32.14
0.05	Whole Genome	59.34
0.05	Whole Genome	23.61
0.05	Whole Genome	35.69
0.05	Whole Genome	4.61
0.05	Whole Genome	33.4
0.05	Whole Genome	31.65
0.05	Whole Genome	54.58
0.05	Whole Genome	12.85
0.05	Whole Genome	46.31
0.05	Whole Genome	41.93
0.05	Whole Genome	35.3
0.05	Whole Genome	18.32
0.05	Whole Genome	0.38
0.05	Whole Genome	10.22
0.05	Whole Genome	15.86
0.05	Whole Genome	13.97
0.05	Whole Genome	25.22
0.05	Whole Genome	33.36
0.05	Whole Genome	31.03
0.05	Whole Genome	7.28
0.05	Whole Genome	29.37
0.05	Whole Genome	10.87
0.05	Whole Genome	45.7
0.05	Whole Genome	42.41
0.05	Whole Genome	32.24
0.05	Whole Genome	10.36
0.05	Whole Genome	16.31
0.05	Whole Genome	36.32
0.05	Whole Genome	8.1
0.05	Whole Genome	40.41
0.05	Whole Genome	5.55
0.05	Whole Genome	34.78
0.05	Whole Genome	25.78
0.05	Whole Genome	17.16
0.05	Whole Genome	20.95
0.05	Whole Genome	22.15
0.05	Whole Genome	23.14
0.05	Whole Genome	3.27
0.05	Whole Genome	24.22
0.05	Whole Genome	36.58
0.05	Whole Genome	23.47
0.05	Whole Genome	25.78
0.05	Whole Genome	32.27
0.05	Whole Genome	54.89
0.15	Whole Genome	0	5672
0.15	Whole Genome	0	5019
0.15	Whole Genome	0	5099
0.15	Whole Genome	0	3093
0.15	Whole Genome	0	5677
0.15	Whole Genome	0.9	6927
0.15	Whole Genome	1.22	11097
0.15	Whole Genome	7.28	5577
0.15	Whole Genome	12.78	6517
0.15	Whole Genome	3.51	7204
0.15	Whole Genome	15.46
0.15	Whole Genome	1.35
0.15	Whole Genome	4.66
0.15	Whole Genome	1.9
0.15	Whole Genome	3.73
0.15	Whole Genome	3.85
0.15	Whole Genome	3.99
0.15	Whole Genome	7.33
0.15	Whole Genome	2.25
0.15	Whole Genome	3.39
0.15	Whole Genome	0.6
0.15	Whole Genome	0.35
0.15	Whole Genome	28.5
0.15	Whole Genome	5.88
0.15	Whole Genome	4.17
0.15	Whole Genome	0.42
0.15	Whole Genome	27.55
0.15	Whole Genome	0.56
0.15	Whole Genome	0.03
0.15	Whole Genome	1.97
0.15	Whole Genome	2.78
0.15	Whole Genome	0.8
0.15	Whole Genome	22.8
0.15	Whole Genome	2.47
0.15	Whole Genome	2.84
0.15	Whole Genome	0.18
0.15	Whole Genome	0.09
0.15	Whole Genome	1.43
0.15	Whole Genome	8.65
0.15	Whole Genome	1.17
0.15	Whole Genome	0.48
0.15	Whole Genome	18.59
0.15	Whole Genome	5.61
0.15	Whole Genome	7.11
0.15	Whole Genome	17.54
0.15	Whole Genome	1.54
0.15	Whole Genome	1.63
0.15	Whole Genome	0.26
0.15	Whole Genome	2.4
0.15	Whole Genome	1.4
0.15	Whole Genome	0.73
0.15	Whole Genome	9.35
0.15	Whole Genome	0.34
0.15	Whole Genome	0.14
0.15	Whole Genome	0.4
0.15	Whole Genome	3.14
0.15	Whole Genome	8.67
0.15	Whole Genome	0.56
0.15	Whole Genome	3.48
0.15	Whole Genome	0.65
0.15	Whole Genome	6.18
0.15	Whole Genome	2.75
0.15	Whole Genome	0.16
0.15	Whole Genome	0.12
0.15	Whole Genome	0.05
0.15	Whole Genome	0.1
0.15	Whole Genome	1.73
0.15	Whole Genome	2.43
0.15	Whole Genome	0.31
0.15	Whole Genome	1.01
0.15	Whole Genome	3.25
0.15	Whole Genome	1.12
0.15	Whole Genome	11.65
0.15	Whole Genome	0.29
0.15	Whole Genome	2.68
0.15	Whole Genome	0.38
0.15	Whole Genome	0.03
0.15	Whole Genome	2.95
0.15	Whole Genome	1.29
0.15	Whole Genome	37.69
0.15	Whole Genome	0.55
0.15	Whole Genome	17.1
0.15	Whole Genome	0.2
0.15	Whole Genome	0.1
0.15	Whole Genome	2.47
0.15	Whole Genome	0.71
0.15	Whole Genome	0.67
0.15	Whole Genome	4.88
0.15	Whole Genome	6.01
0.15	Whole Genome	4.79
0.15	Whole Genome	0.4
0.15	Whole Genome	5.83
0.15	Whole Genome	0.27
0.15	Whole Genome	11.44
0.15	Whole Genome	0.75
0.15	Whole Genome	7.18
0.15	Whole Genome	1.01
0.15	Whole Genome	29.56
0.15	Whole Genome	0.08
0.25	Whole Genome	0	11317
0.25	Whole Genome	0	4203
0.25	Whole Genome	0	5752
0.25	Whole Genome	0	7379
0.25	Whole Genome	0	10485
0.25	Whole Genome	0
0.25	Whole Genome	0
0.25	Whole Genome	0
0.25	Whole Genome	0
0.25	Whole Genome	0
0.25	Whole Genome	0
0.25	Whole Genome	0
0.25	Whole Genome	0
0.25	Whole Genome	0
0.25	Whole Genome	0
0.25	Whole Genome	0
0.25	Whole Genome	0
0.25	Whole Genome	0
0.25	Whole Genome	0
0.25	Whole Genome	0
0.25	Whole Genome	0
0.25	Whole Genome	0
0.25	Whole Genome	0
0.25	Whole Genome	0
0.25	Whole Genome	0
0.25	Whole Genome	0
0.25	Whole Genome	0
0.25	Whole Genome	0
0.25	Whole Genome	0
0.25	Whole Genome	0
0.25	Whole Genome	0
0.25	Whole Genome	0.03
0.25	Whole Genome	0.95
0.25	Whole Genome	0.18
0.25	Whole Genome	0.75
0.25	Whole Genome	0.24
0.25	Whole Genome	0.19
0.25	Whole Genome	1.17
0.25	Whole Genome	5.09
0.25	Whole Genome	10.43
0.25	Whole Genome	0.29
0.25	Whole Genome	1.89
0.25	Whole Genome	2.27
0.25	Whole Genome	0.13
0.25	Whole Genome	0.23
0.25	Whole Genome	5.55
0.25	Whole Genome	3.53
0.25	Whole Genome	5.38
0.25	Whole Genome	1.78
0.25	Whole Genome	1.1
0.25	Whole Genome	0.15
0.25	Whole Genome	0.03
0.25	Whole Genome	0.24
0.25	Whole Genome	0.06
0.25	Whole Genome	0.03
0.25	Whole Genome	0.6
0.25	Whole Genome	0.07
0.25	Whole Genome	0.63
0.25	Whole Genome	3.08
0.25	Whole Genome	0.53
0.25	Whole Genome	0.45
0.25	Whole Genome	0.03
0.25	Whole Genome	0.03
0.25	Whole Genome	5.49
0.25	Whole Genome	0.16
0.25	Whole Genome	7.04
0.25	Whole Genome	0.03
0.25	Whole Genome	2.06
0.25	Whole Genome	0.03
0.25	Whole Genome	22.3
0.25	Whole Genome	2.77
0.25	Whole Genome	2.84
0.25	Whole Genome	2.93
0.25	Whole Genome	0.06
0.25	Whole Genome	0.1
0.25	Whole Genome	0.26
0.25	Whole Genome	0.74
0.25	Whole Genome	0.15
0.25	Whole Genome	0.45
0.25	Whole Genome	0.67
0.25	Whole Genome	2.1
0.25	Whole Genome	0.29
0.25	Whole Genome	7.02
0.25	Whole Genome	2.34
0.25	Whole Genome	2.06
0.25	Whole Genome	1.29
0.25	Whole Genome	1.27
0.25	Whole Genome	8.72
0.25	Whole Genome	1.88
0.25	Whole Genome	3.46
0.25	Whole Genome	10.86
0.25	Whole Genome	0.03
0.25	Whole Genome	4.12
0.25	Whole Genome	0.08
0.25	Whole Genome	0.08
0.25	Whole Genome	0.32
